# Supplementary material for: Out of southern East Asia: the natural history of domestic dogs across the world
Source: PubMed Central journal article supplement — Cell Res. 2015 Dec 15;26(1):21–33. doi: 10.1038/cr.2015.147 (PMC4816135; doi:10.1038/cr.2015.147), 2015-12-15
Supplement: cr2015147x17.pdf [file cr2015147x17.pdf]

Supplementary Figure S1

Coat color

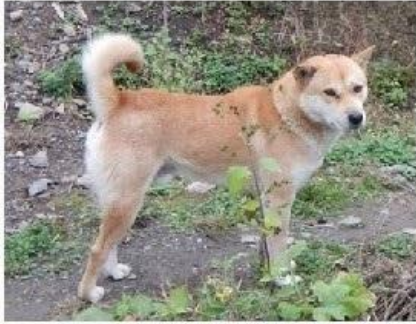

Yellow

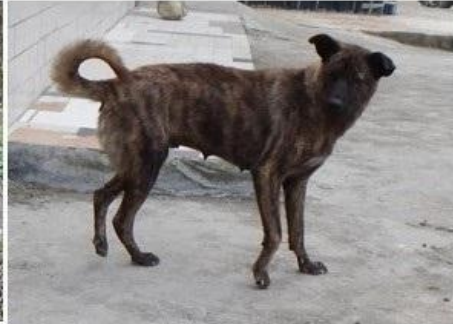

brindle

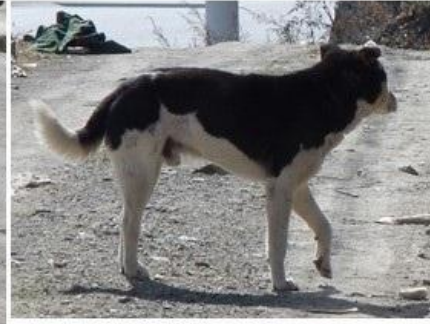

plaque

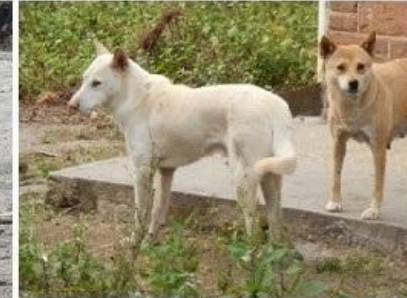

White and yellow

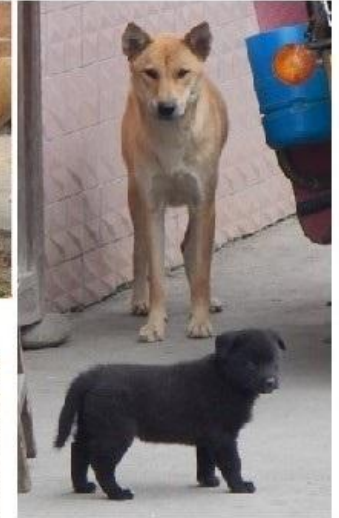

yellow and black

Ear

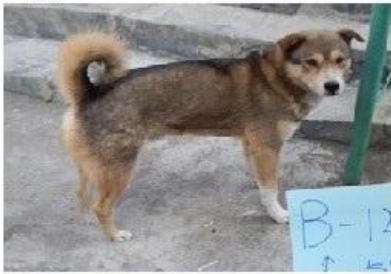

lop

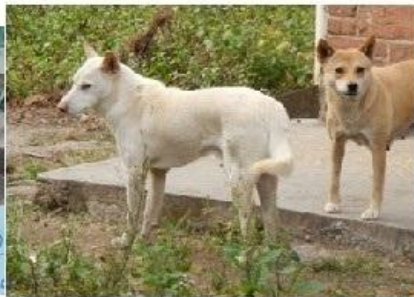

prick

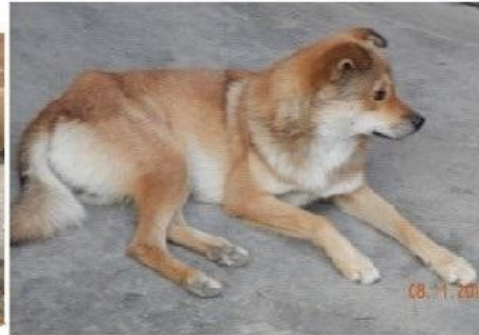

half erect

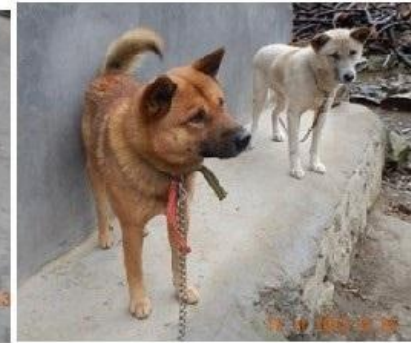

prick

Tail

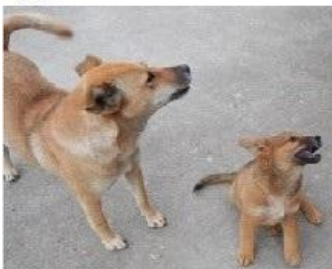

Curly and slender

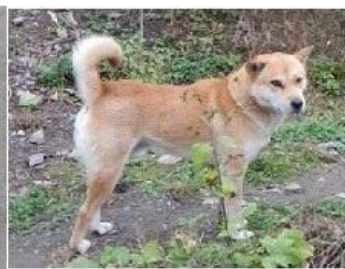

Curly and bushy

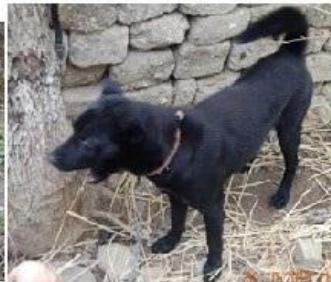

Curly and bushy

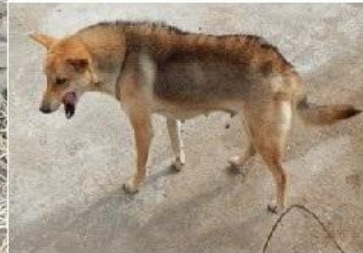

Lop and slender

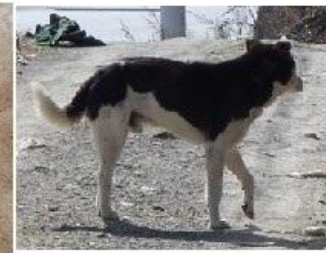

Lop and bushy

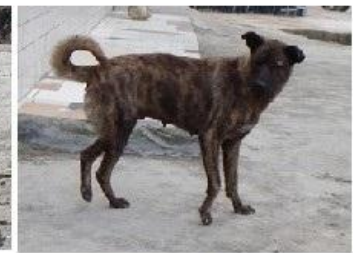

Curly and bushy

**Supplementary Information, Figure S1. The morphological features of Chinese indigenous dogs**
