# Supplementary material for: Out of southern East Asia: the natural history of domestic dogs across the world
Source: PubMed Central journal article supplement — Cell Res. 2015 Dec 15;26(1):21–33. doi: 10.1038/cr.2015.147 (PMC4816135; doi:10.1038/cr.2015.147), 2015-12-15
Supplement: cr2015147x18.pdf [file cr2015147x18.pdf]

## Supplementary Figure S2

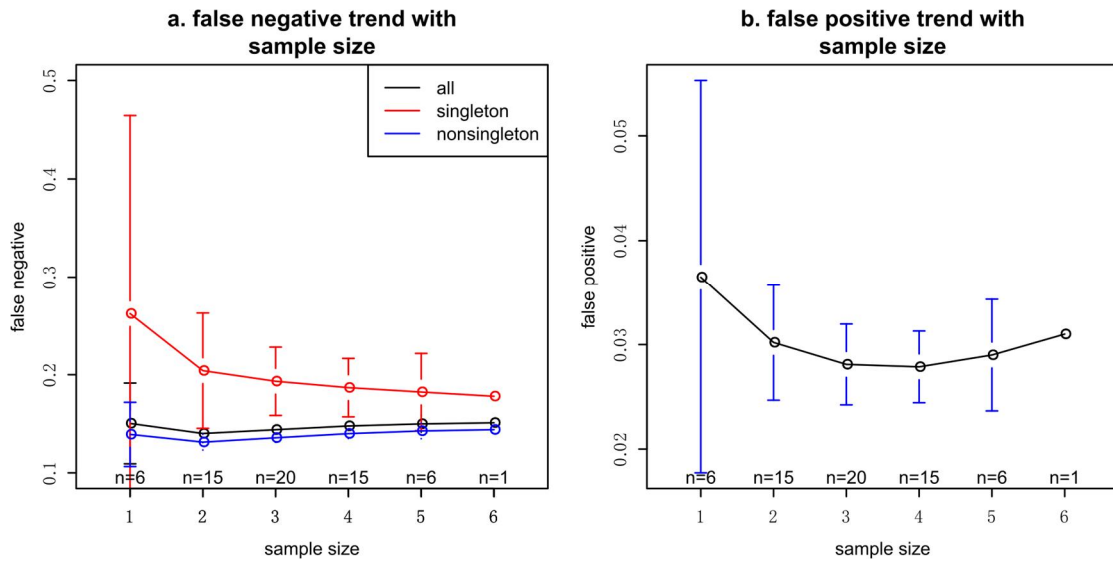

**Supplementary Information, Figure S2. FN and FP as a function of sequenced individuals**

The x axis is the number of individuals and the y axis is the statistic of interest. In panel a, the false negative is also split into two groups (singleton and nonsingleton group). The confidence interval is calculated by randomly sample x number of individuals from the six Sanger verified individuals.
