# Supplementary material for: Out of southern East Asia: the natural history of domestic dogs across the world
Source: PubMed Central journal article supplement — Cell Res. 2015 Dec 15;26(1):21–33. doi: 10.1038/cr.2015.147 (PMC4816135; doi:10.1038/cr.2015.147), 2015-12-15
Supplement: cr2015147x19.pdf [file cr2015147x19.pdf]

Supplementary Figure S3

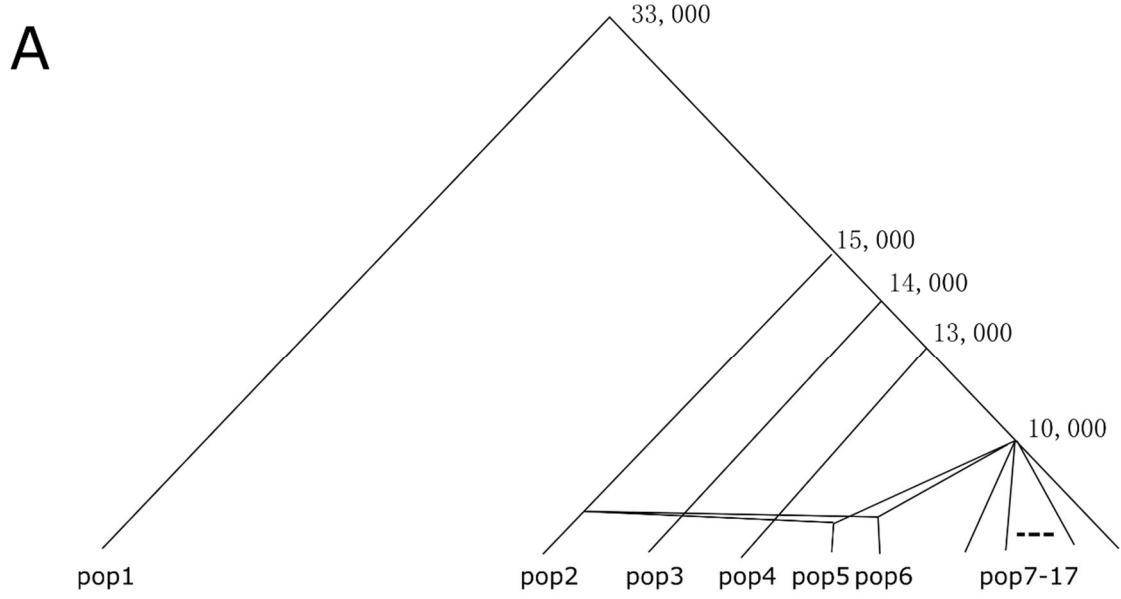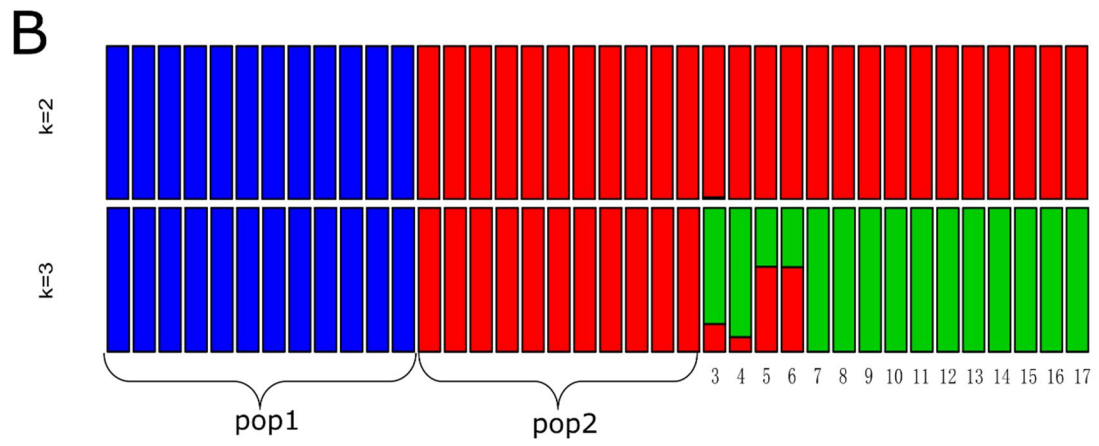

**Supplementary Information, Figure S3. Simulated scheme to study the mixed components in the structure analysis.**

The ms code for this simulation is:

```
ms 76 50000 -s 1 -I 17 24 22 2 2 2 2 2 2 2 2 2 2 2 2 2 2 \
-n 1 1 -n 2 0.3333 -n 3 0.25 -n 4 0.25 -n 5 0.2 -n 6 0.2 -n 7 0.2 -n 8 0.2 \
-n 9 0.2 -n 10 0.2 -n 11 0.2 -n 12 0.2 -n 13 0.2 -n 14 0.2 -n 15 0.2 \
-n 16 0.2 -n 17 0.2 \
-es 0.0003125 5 0.5 -en 0.0003125 5 0.2 -ej 0.0003125 18 2 \
-es 0.0003125 6 0.5 -en 0.0003125 6 0.2 -ej 0.0003125 19 2 \
-ej 0.01041667 6 5 -ej 0.01041667 7 5 -ej 0.01041667 8 5 -ej 0.01041667 9 5 \
-ej 0.01041667 10 5 -ej 0.01041667 11 5 -ej 0.01041667 12 5 \
-ej 0.01041667 13 5 -ej 0.01041667 14 5 -ej 0.01041667 15 5 \
-ej 0.01041667 16 5 -ej 0.01041667 17 5 -ej 0.01354167 5 4 \
-ej 0.01458333 4 3 -ej 0.015625 3 2 -ej 0.034375 2 1
```
