# Supplementary material for: Out of southern East Asia: the natural history of domestic dogs across the world
Source: PubMed Central journal article supplement — Cell Res. 2015 Dec 15;26(1):21–33. doi: 10.1038/cr.2015.147 (PMC4816135; doi:10.1038/cr.2015.147), 2015-12-15
Supplement: cr2015147x21.pdf [file cr2015147x21.pdf]

Supplementary Figure S5

**A**

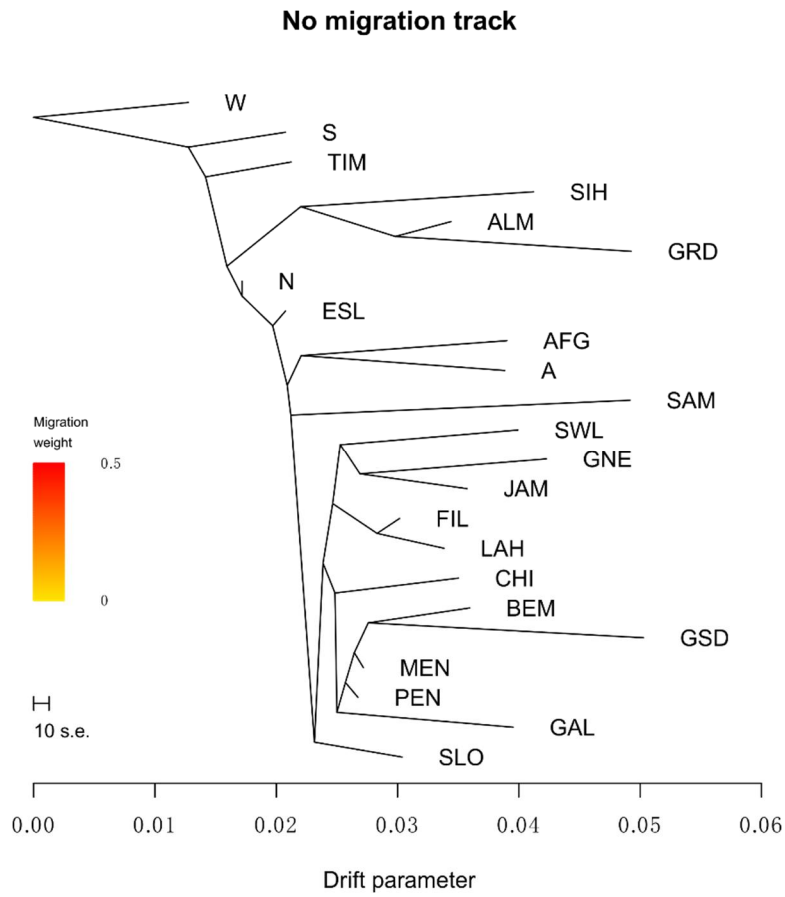

**B**

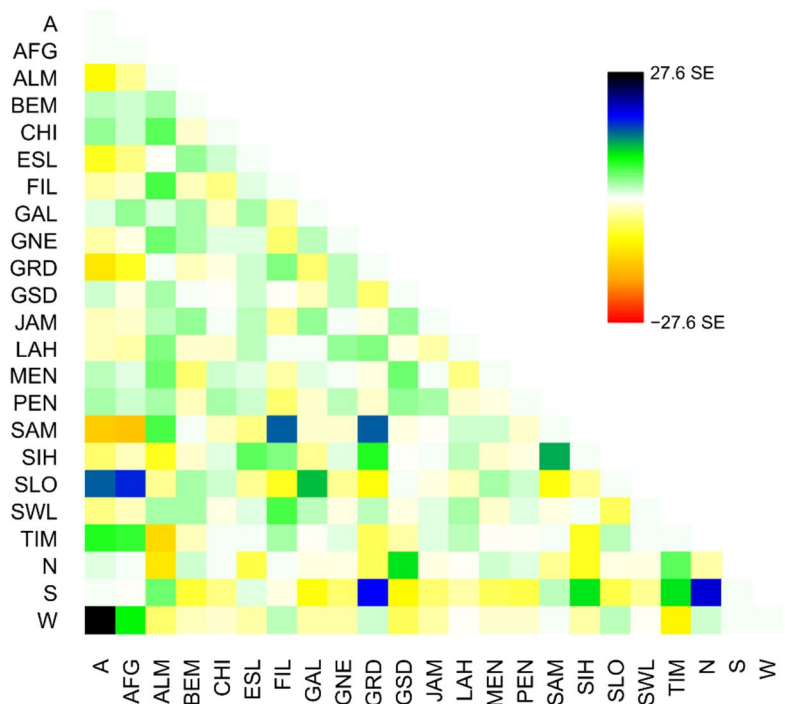

C

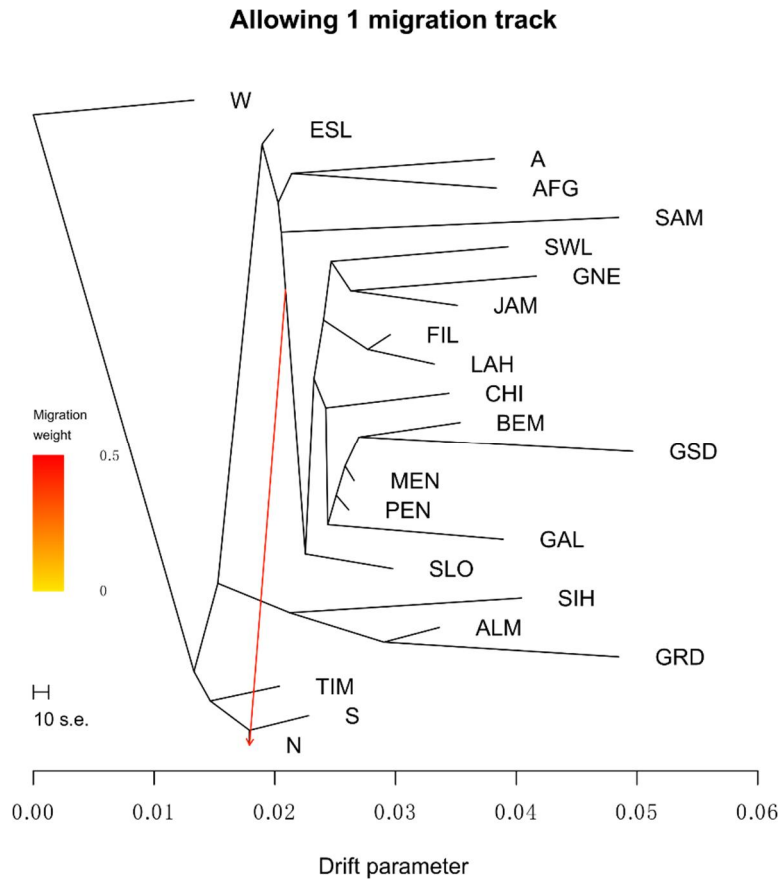

D

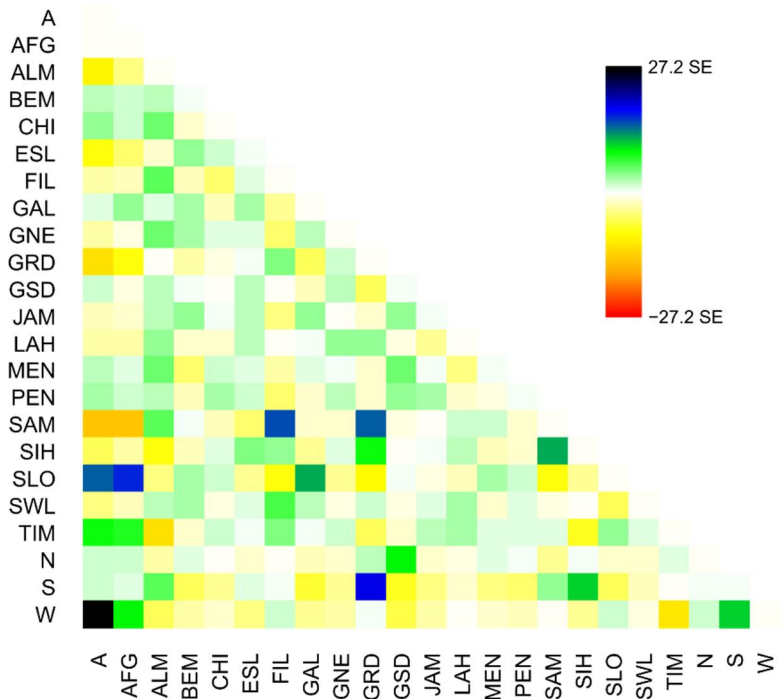

**E**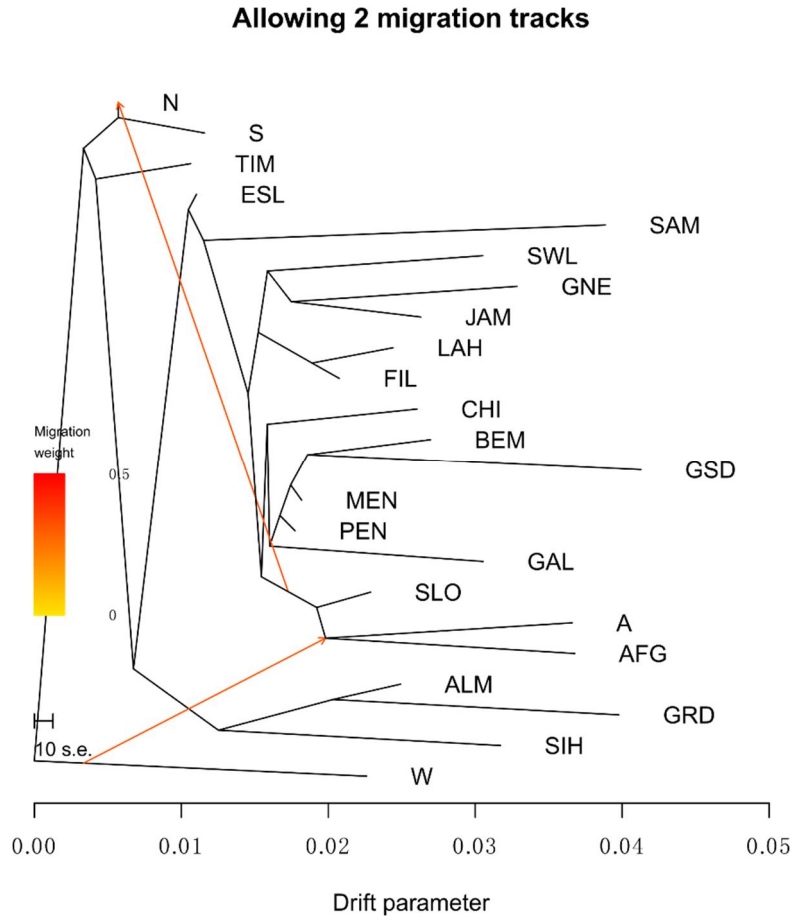**F**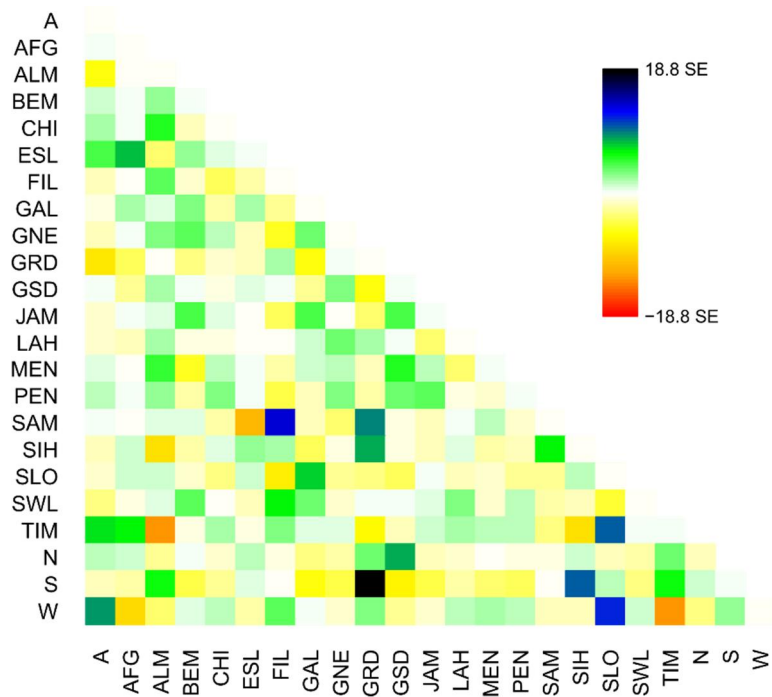

G

Allowing 3 migration tracks

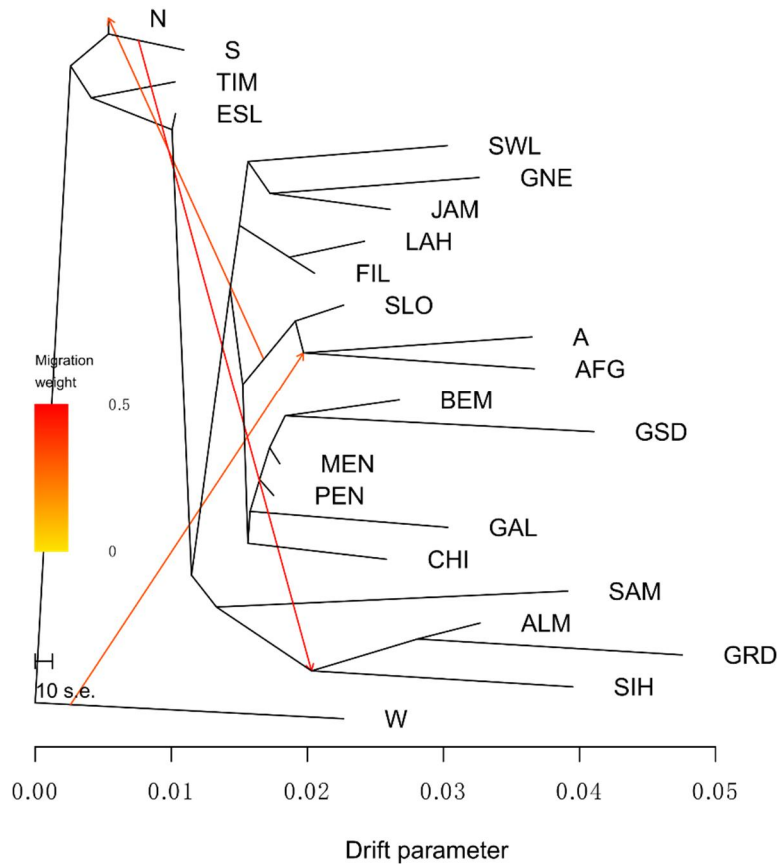

H

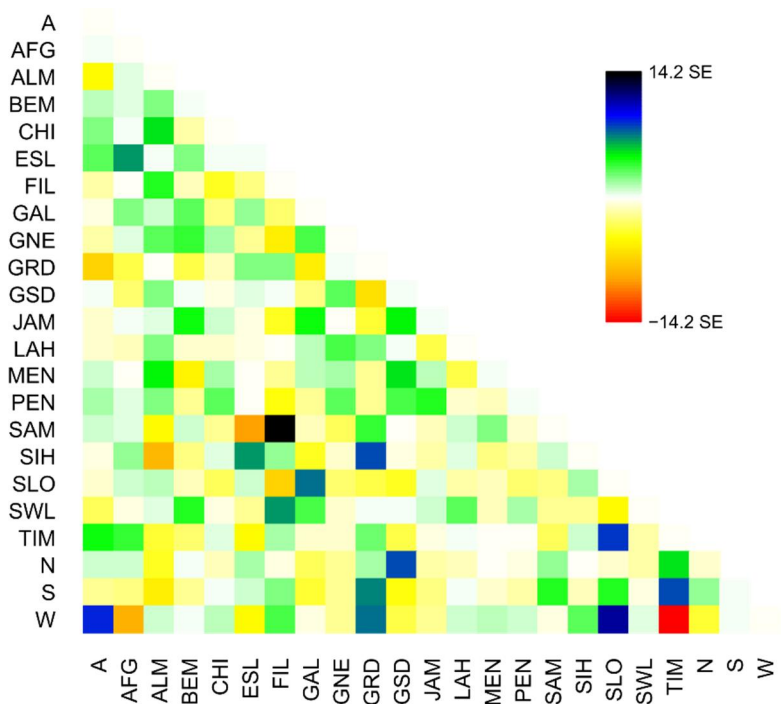

**Supplementary Information, Figure S5. Treemix results with different numbers of migration tracks**

Here W represents wolves, S is southern Chinese indigenous dogs, N is northern Chinese indigenous dogs, A is the African village dogs. The rest of the abbreviations are for breeds (see maintext).
