# Supplementary material for: Out of southern East Asia: the natural history of domestic dogs across the world
Source: PubMed Central journal article supplement — Cell Res. 2015 Dec 15;26(1):21–33. doi: 10.1038/cr.2015.147 (PMC4816135; doi:10.1038/cr.2015.147), 2015-12-15
Supplement: cr2015147x22.pdf [file cr2015147x22.pdf]

Supplementary Figure S6

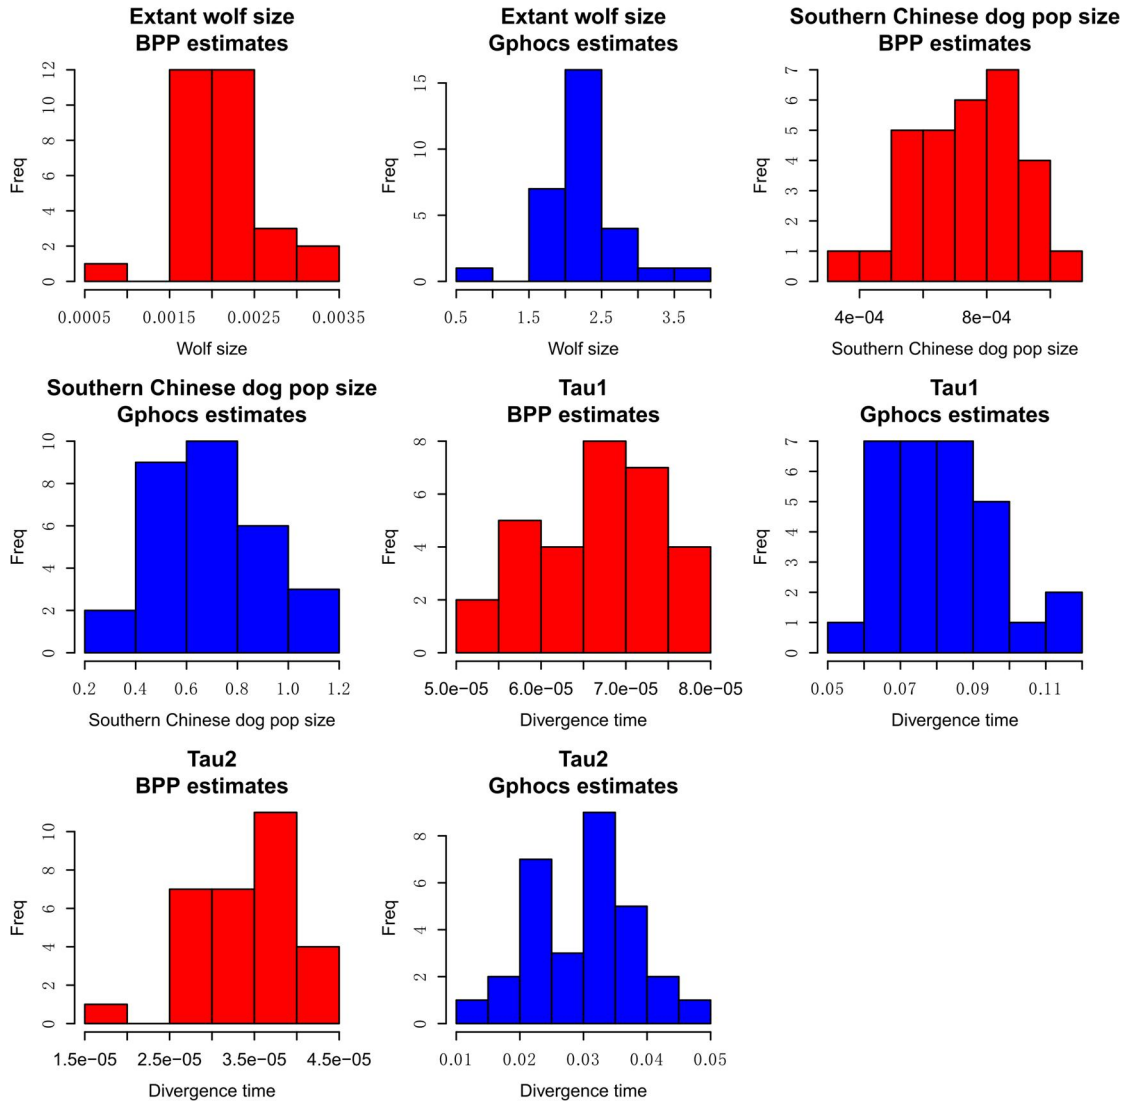

**Supplementary Information, Figure S6. BPP/G-PhoCS analysis for the first group analysis**

Tau1 is the divergence time between wolves and dogs. Tau2 is the divergence time between the Southern Chinese indigenous dogs and other dogs. See Figure 2 for details.
