# Supplementary material for: Out of southern East Asia: the natural history of domestic dogs across the world
Source: PubMed Central journal article supplement — Cell Res. 2015 Dec 15;26(1):21–33. doi: 10.1038/cr.2015.147 (PMC4816135; doi:10.1038/cr.2015.147), 2015-12-15
Supplement: cr2015147x24.pdf [file cr2015147x24.pdf]

# Supplementary Figure S8

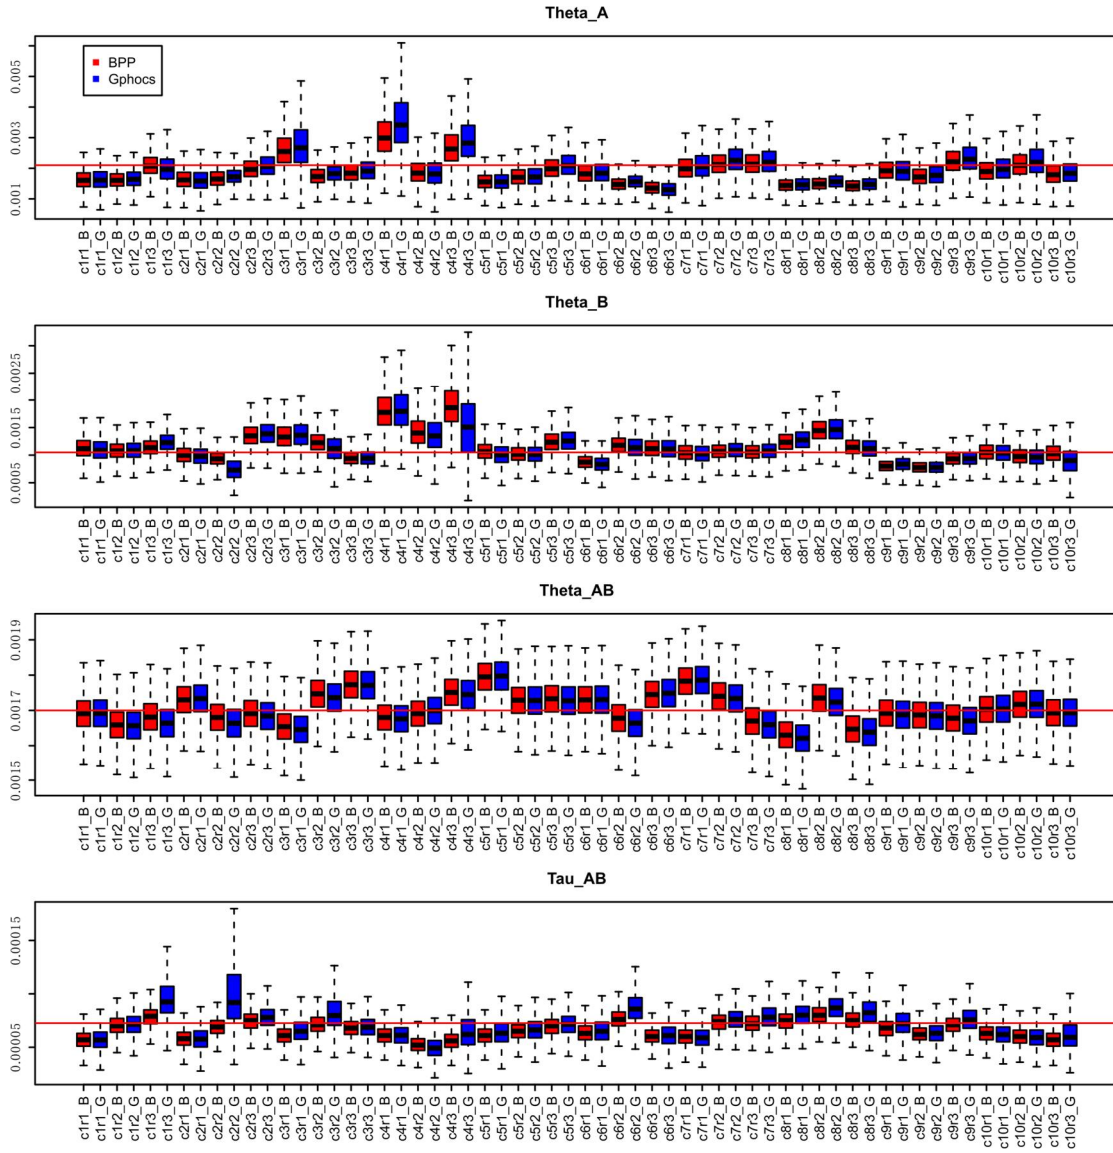

**Supplementary Information, Figure S8. Parameter estimates under a wide variety of demographic simulations**

On the x axis,  $\text{cir}_j_{B/G}$ ,  $i$  is the difference in the demographic scenarios,  $j$  is the replicate number of the simulation (each case was simulated with three replicates). The B/G is the BPP or G-PhoCS run.  $\text{Theta}_A$  is the estimated  $\theta(4N\mu)$  for the first population,  $\text{Theta}_B$  is for the second population and  $\text{Theta}_{AB}$  is the ancestral population.  $\text{Tau}_{AB}$  is the divergence time between the two populations. The baseline value of the simulation is shown in the red horizontal line. For the  $\text{Tau}_{AB}$  panel, the red line is the true value in all the simulations.
