# Supplementary material for: Out of southern East Asia: the natural history of domestic dogs across the world
Source: PubMed Central journal article supplement — Cell Res. 2015 Dec 15;26(1):21–33. doi: 10.1038/cr.2015.147 (PMC4816135; doi:10.1038/cr.2015.147), 2015-12-15
Supplement: cr2015147x26.pdf [file cr2015147x26.pdf]

Supplementary Figure S10

**A**

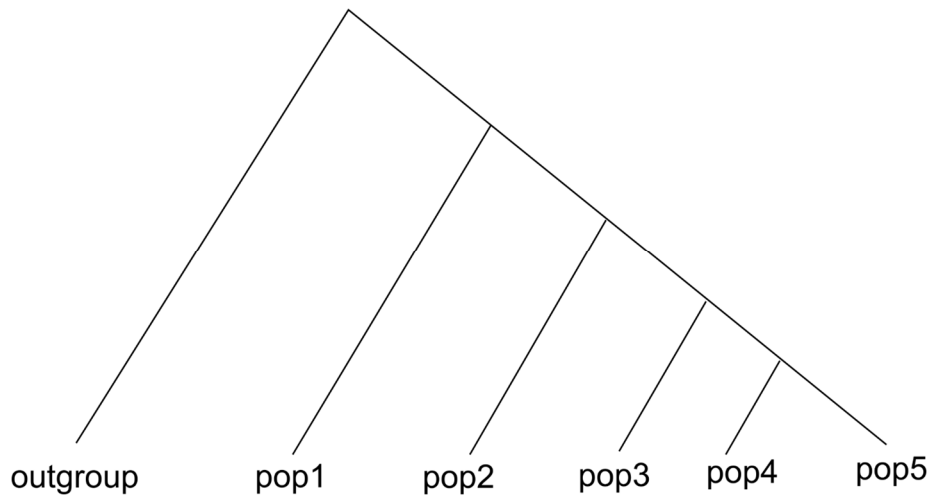

**B**

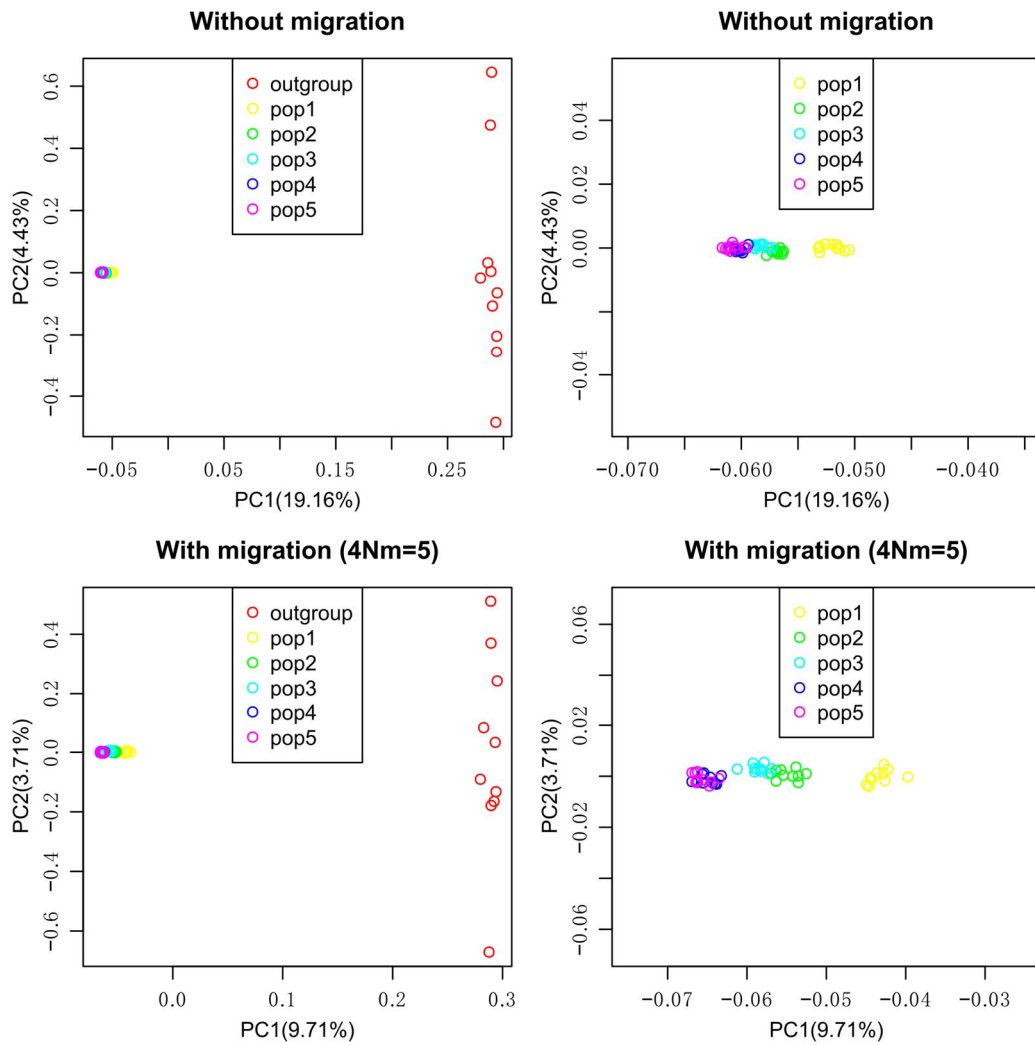

**Supplementary Information, Figure S10. Serial founder models can create patterns observed in the PCA analysis**

**A)** The cartoon illustrates the serial founder model. The ms string for the simulation is  
ms 120 50000 -s 1 -I 6 20 20 20 20 20 20 -n 1 1 -n 2 0.5 -n 3 0.25 -n 4 0.25 -n 5 0.2 -n  
6 0.2 -m 1 2 \$mig -m 1 3 \$mig -m 1 4 \$mig -m 1 5 \$mig -m 1 6 \$mig -m 2 1 \$mig -m  
3 1 \$mig -m 4 1 \$mig -m 5 1 \$mig -m 6 1 \$mig -en 0.0075 6 0.05 -ej 0.008 6 5 -en  
0.0115 5 0.05 -ej 0.012 5 4 -en 0.0135 4 0.05 -ej 0.014 4 3 -en 0.015 3 0.05 -ej 0.015625  
3 2 -en 0.015625 2 0.05 -ej 0.034375 2 1

**B)** PCA for the simulation with/without migration. When there is migration, the migration rate is set to  $4Nm=5$ . The left panels are the overall PCA plot and the right panels are for the focal group.
