# Supplementary material for: Out of southern East Asia: the natural history of domestic dogs across the world
Source: PubMed Central journal article supplement — Cell Res. 2015 Dec 15;26(1):21–33. doi: 10.1038/cr.2015.147 (PMC4816135; doi:10.1038/cr.2015.147), 2015-12-15
Supplement: cr2015147x28.pdf [file cr2015147x28.pdf]

### A. Southern Route (SR)

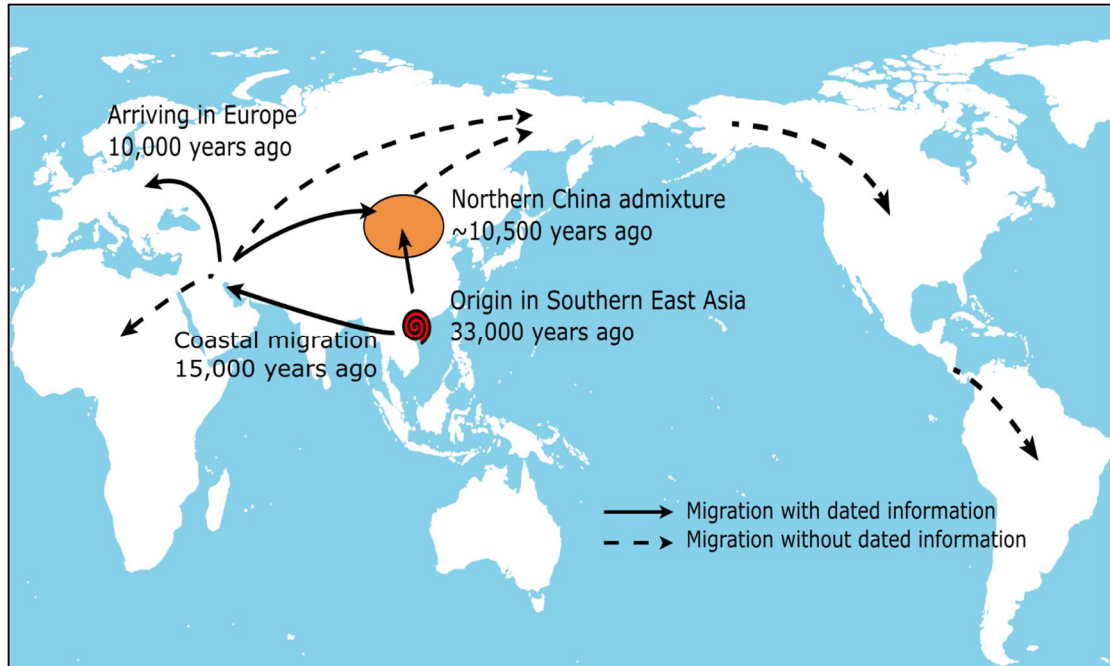

### B. Northern Route (NR)

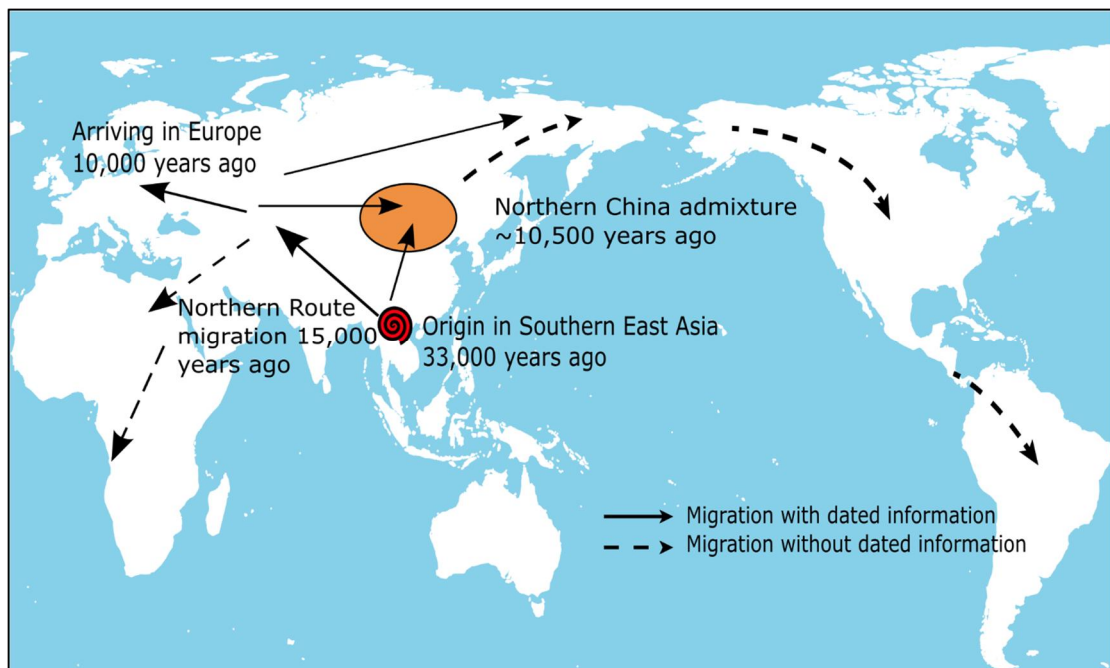

**Supplementary Information, Figure S12. Two possible migration routes**

There are two possible migration routes. One is through the Indian coastal areas south of the Tibetan Plateau (denoted as Southern Route, SR). The other is through the inland areas north of the Tibetan Plateau (denoted as Northern Route, NR).
