# Supplementary material for: Out of southern East Asia: the natural history of domestic dogs across the world
Source: PubMed Central journal article supplement — Cell Res. 2015 Dec 15;26(1):21–33. doi: 10.1038/cr.2015.147 (PMC4816135; doi:10.1038/cr.2015.147), 2015-12-15
Supplement: cr2015147x29.pdf [file cr2015147x29.pdf]

Supplementary Figure S13

### The likelihood of the admixture time

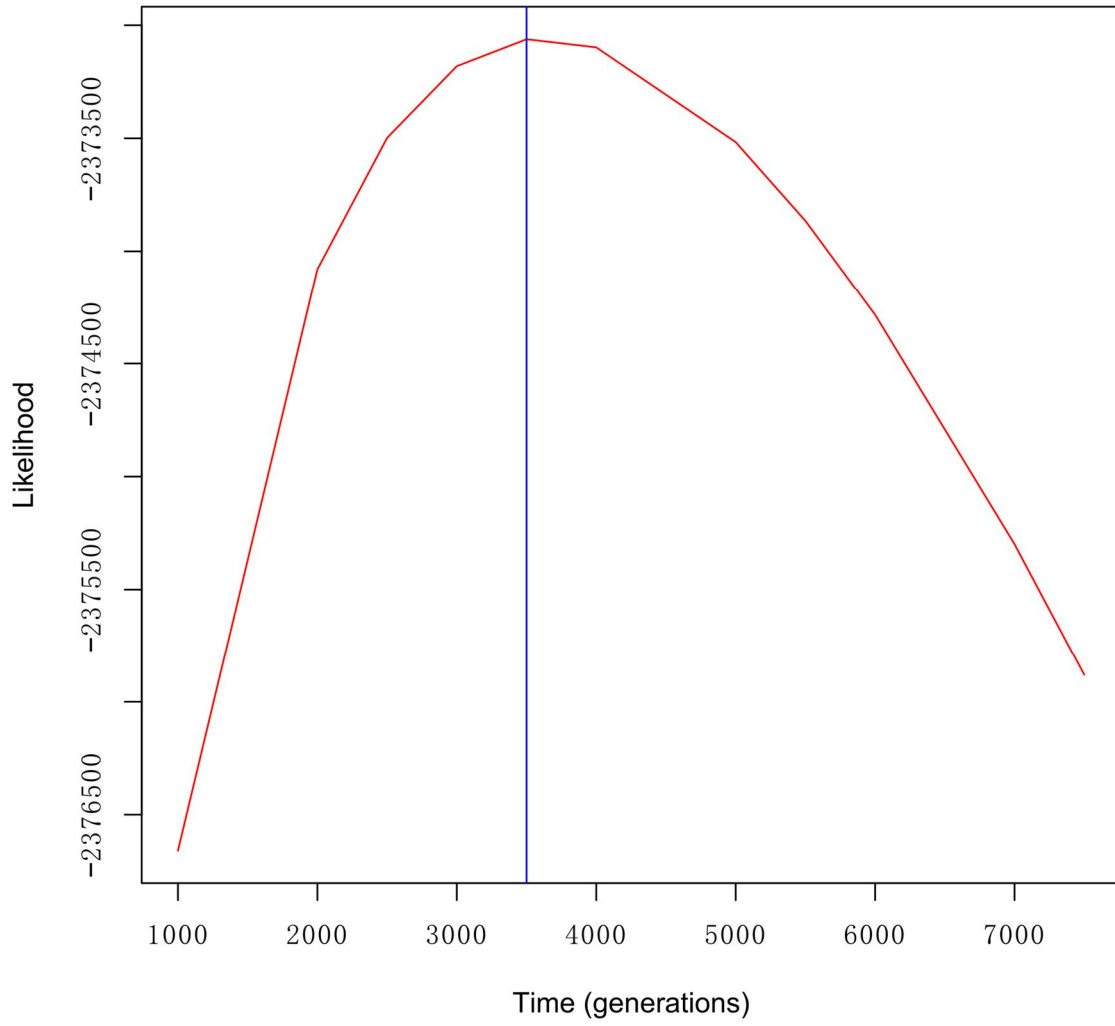

**Supplementary Information, Figure S13. Estimated admixture time for the Northern Chinese indigenous dogs**
