# Supplementary material for: Out of southern East Asia: the natural history of domestic dogs across the world
Source: PubMed Central journal article supplement — Cell Res. 2015 Dec 15;26(1):21–33. doi: 10.1038/cr.2015.147 (PMC4816135; doi:10.1038/cr.2015.147), 2015-12-15
Supplement: cr2015147x30.pdf [file cr2015147x30.pdf]

Supplementary Figure S14

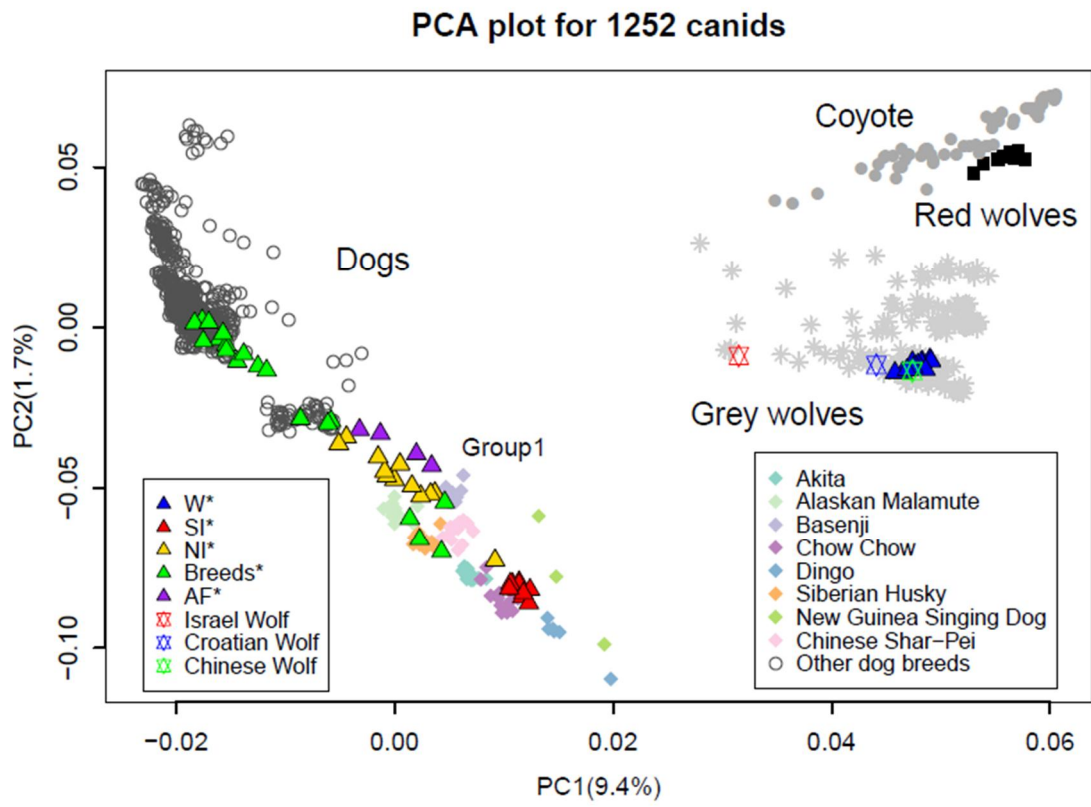

**Supplementary Information, Figure S14. PCA plot including the three wolves sampled from an earlier publication**

The three wolves from Freedman et al 2014 PLOS Genetics were added to our PCA analysis and the results are shown together with all the sampled individuals in the SNP array dataset.
