# Supplementary material for: Out of southern East Asia: the natural history of domestic dogs across the world
Source: PubMed Central journal article supplement — Cell Res. 2015 Dec 15;26(1):21–33. doi: 10.1038/cr.2015.147 (PMC4816135; doi:10.1038/cr.2015.147), 2015-12-15
Supplement: cr2015147x31.pdf [file cr2015147x31.pdf]

**Supplementary Information, Table S1 Sample information and sequencing throughput**

|                             | <b>Location</b>      | <b>Internal ID</b>       | <b><u>Abbreviation</u></b> | <b>Population Name</b>  | <b># Reads</b> | <b># Mappable Reads</b> | <b>Coverage</b> |
|-----------------------------|----------------------|--------------------------|----------------------------|-------------------------|----------------|-------------------------|-----------------|
| North China                 | Xi'an #              | FAMICHN00001(do<br>gCI1) | -                          | Chinese indigenous dogs | 501,320,632    | 379,500,964             | 13.56           |
|                             | Ya'an #              | FAMICHN00003(do<br>gCI3) | -                          | Chinese indigenous dogs | 256,257,546    | 208,842,818             | 10.25           |
|                             | Dalian               | FAMICHN00004             | -                          | Chinese indigenous dogs | 425,767,262    | 416,124,220             | 16.2            |
|                             | Gansu                | FAMICHN00005             | -                          | Chinese indigenous dogs | 447,635,390    | 440,899,248             | 18.5            |
|                             | Gansu                | FAMICHN00006             | -                          | Chinese indigenous dogs | 438,807,084    | 434,379,436             | 14.9            |
|                             | Gansu                | FAMICHN00007             | -                          | Chinese indigenous dogs | 410,559,676    | 405,277,484             | 17.2            |
|                             | Hebei                | FAMICHN00012             | -                          | Chinese indigenous dogs | 456,106,666    | 445,694,949             | 17.7            |
|                             | Shanxi               | FAMICHN00014             | -                          | Chinese indigenous dogs | 472,063,048    | 459,725,323             | 16.3            |
|                             | Shanxi               | FAMICHN00015             | -                          | Chinese indigenous dogs | 423,119,788    | 412,471,810             | 15.8            |
|                             | Shaanxi              | FAMICHN00016             | -                          | Chinese indigenous dogs | 436,695,632    | 417,248,612             | 16.7            |
|                             | Shaanxi              | FAMICHN00017             | -                          | Chinese indigenous dogs | 313,493,136    | 304,925,107             | 11.8            |
| Xinjiang                    | FAMICHN00019         | -                        | Chinese indigenous dogs    | 467,579,742             | 461,276,809    | 16.8                    |                 |
| South China                 | Ya'an#               | FAMICHN00002(do<br>gCI2) | -                          | Chinese indigenous dogs | 340,944,550    | 188,142,458             | 9.83            |
|                             | Guangdong            | FAMICHN00010             | -                          | Chinese indigenous dogs | 424,086,052    | 414,375,959             | 16.6            |
|                             | Guizhou              | FAMICHN00011             | -                          | Chinese indigenous dogs | 433,775,426    | 426,300,456             | 16.1            |
|                             | Yunnan               | FAMICHN00021             | -                          | Chinese indigenous dogs | 400,561,080    | 395,441,104             | 15.0            |
|                             | Yunnan               | FAMICHN00023             | -                          | Chinese indigenous dogs | 444,278,360    | 429,321,106             | 15.6            |
|                             | Anhui                | FAMICHN00025             | -                          | Chinese indigenous dogs | 271,030,020    | 214,077,128             | 8.3             |
| China/Vietnam border region | China/Vietnam border | FAMIVNM00001             | -                          | Chinese indigenous dogs | 405,241,522    | 392,367,844             | 16.4            |
|                             | China/Vietnam border | FAMIVNM00002             | -                          | Chinese indigenous dogs | 423,233,512    | 411,213,685             | 17.2            |

|            |                                     |              |            |                                   |             |             |      |
|------------|-------------------------------------|--------------|------------|-----------------------------------|-------------|-------------|------|
|            | China/Vietnam border                | FAMIVNM00003 | -          | Chinese indigenous dogs           | 378,294,026 | 345,453,760 | 14.4 |
|            | China/Vietnam border                | FAMIVNM00004 | -          | Chinese indigenous dogs           | 442,436,614 | 436,365,448 | 18.4 |
|            | China/Vietnam border                | FAMIVNM00005 | -          | Chinese indigenous dogs           | 431,196,780 | 423,866,135 | 17.8 |
| Africa     | Ibadan, Nigeria                     | FAMINGR00001 | <u>AF</u>  | Nigerian dogs                     | 431,318,600 | 425,869,086 | 16.5 |
|            | Ondo, Nigeria                       | FAMINGR00002 | <u>AF</u>  | Nigerian dogs                     | 431,243,540 | 424,894,582 | 16.3 |
|            | Uyo, Nigeria                        | FAMINGR00003 | <u>AF</u>  | Nigerian dogs                     | 402,118,442 | 380,042,436 | 14.5 |
|            | Taraba State, Jalingo City, Nigeria | FAMINGR00004 | <u>AF</u>  | Nigerian dogs                     | 441,067,384 | 433,777,247 | 16.8 |
| Breed dogs | Afghan                              | FAMBAGF00001 | <u>AFG</u> | Afghan                            | 430,297,050 | 421,455,097 | 16.1 |
|            | Alaskan Malamute                    | FAMBALM00001 | <u>ALM</u> | Alaskan Malamute                  | 395,998,704 | 390,060,562 | 15.0 |
|            | Chihuahua                           | FAMBCHI00001 | <u>CHI</u> | Chihuahua                         | 450,505,562 | 440,258,832 | 16.5 |
|            | Galgo Español                       | FAMBGAL00001 | <u>GAL</u> | Galgo Español (Spanish greyhound) | 417,546,704 | 412,723,974 | 12.9 |
|            | Greenland dog                       | FAMGRD00001  | <u>GRD</u> | Greenland dog                     | 405,114,256 | 397,809,809 | 14.8 |
|            | Gray Norwegian Elkhound             | FAMBGNE00001 | <u>GNE</u> | Gray Norwegian Elkhound           | 451,936,584 | 446,647,240 | 16.8 |
|            | Jämthund                            | FAMBJAM00001 | <u>JAM</u> | Jämthund                          | 885,501,424 | 874,326,644 | 34.7 |
|            | Lapponian Herder                    | FAMBLAH00001 | <u>LAH</u> | Lapponian Herder                  | 387,237,594 | 383,311,716 | 14.7 |
|            | Mexican naked (hairless)            | FAMBMEN00001 | <u>MEN</u> | Mexican naked (hairless)          | 399,454,374 | 391,671,681 | 15.1 |
|            | Peruvian naked (hairless)           | FAMBPEN00001 | <u>PEN</u> | Peruvian naked (hairless)         | 433,291,614 | 426,506,956 | 16.2 |
|            | Swedish Lapphund                    | FAMBSWL00001 | <u>SWL</u> | Swedish Lapphund                  | 413,569,460 | 409,911,397 | 16.3 |
|            | Samoyed                             | FAMBSAM00001 | <u>SAM</u> | Samoyed                           | 404,482,166 | 400,157,800 | 13.5 |
|            | Siberian Husky                      | FAMBSIH00001 | <u>SIH</u> | Siberian Husky                    | 431,981,998 | 425,258,352 | 12.8 |

|        |                                    |                      |            |                     |               |               |       |
|--------|------------------------------------|----------------------|------------|---------------------|---------------|---------------|-------|
|        | East Siberian Laika                | FAMBESL00001         | <u>ESL</u> | East Siberian Laika | 425,030,978   | 414,674,161   | 15.5  |
|        | Finnish Lapphund                   | FAMBFIL00001         | <u>FIL</u> | Finnish Lapphund    | 415,114,298   | 410,055,972   | 14.1  |
|        | Sloughi                            | FAMBSLO00001         | <u>SLO</u> | Sloughi             | 463,318,386   | 457,913,723   | 17.9  |
|        | German Shepherd Dog <sup>#</sup>   | FAMBGSD00001(do gGS) | <u>GSD</u> | German Shepherd Dog | 511,223,572   | 450,994,503   | 9.56  |
|        | Tibetan Mastiff <sup>#</sup>       | FAMBTIM00001(do gTM) | <u>TIM</u> | Tibetan Mastiff     | 388,735,064   | 328,358,588   | 10.37 |
|        | Belgian Malinois <sup>#</sup>      | FAMBBEM00001(do gBM) | <u>BEM</u> | Belgian Malinois    | 380,208,396   | 375,315,337   | 10.11 |
| Wolves | Inner Mongolia                     | LUPZCHN00002         | <u>W</u>   | Gray wolves         | 372,636,036   | 309,361,402   | 9.9   |
|        | Liaoning                           | LUPWCHN00003         | <u>W</u>   | Gray wolves         | 407,054,798   | 394,673,018   | 15.5  |
|        | Shanxi                             | LUPZCHN00005         | <u>W</u>   | Gray wolves         | 299,880,830   | 256,943,167   | 8.5   |
|        | Shanxi                             | LUPZCHN00006         | <u>W</u>   | Gray wolves         | 421,498,238   | 409,627,830   | 12.6  |
|        | Xinjiang                           | LUPWCHN00008         | <u>W</u>   | Gray wolves         | 425,195,874   | 391,242,303   | 11.7  |
|        | Xinjiang                           | LUPWCHN00009         | <u>W</u>   | Gray wolves         | 763,602,328   | 735,932,849   | 28.2  |
|        | Xinjiang                           | LUPWCHN00010         | <u>W</u>   | Gray wolves         | 451,433,936   | 445,031,162   | 15.9  |
|        | Xinjiang                           | LUPWCHN00013         | <u>W</u>   | Gray wolves         | 570,411,354   | 464,887,817   | 17.0  |
|        | Inner Mongolia, China <sup>#</sup> | LUPWCHN00001(G W4)   | <u>W</u>   | Gray wolves         | 508,059,006   | 470,450,456   | 9.61  |
|        | Altai, Russia <sup>#</sup>         | LUPWRUS00001(G W1)   | <u>W</u>   | Gray wolves         | 324,353,286   | 275,881,595   | 11.24 |
|        | Chukotka, Russia <sup>#</sup>      | LUPWRUS00002(G W2)   | <u>W</u>   | Gray wolves         | 230,568,082   | 199,744,251   | 8.92  |
|        | Bryansk, Russia <sup>#</sup>       | LUPWRUS00003(G W3)   | <u>W</u>   | Gray wolves         | 434,683,532   | 308,523,354   | 11.10 |
| Dhole  | Beijing Zoo                        | RUFZCHN00001         |            | Cuon alpinus        | 1,097,037,696 | 1,040,336,193 | 16.1  |

#Those samples are sequenced in a previous study<sup>1</sup>. Their IDs in that paper are provided in parentheses in Internal ID column.

<sup>1</sup>Wang GD, Zhai W, Yang HC *et al.* The genomics of selection in dogs and the parallel evolution between dogs and humans. *Nature communications* 2013; **4**:1860.
