# Supplementary material for: Out of southern East Asia: the natural history of domestic dogs across the world
Source: PubMed Central journal article supplement — Cell Res. 2015 Dec 15;26(1):21–33. doi: 10.1038/cr.2015.147 (PMC4816135; doi:10.1038/cr.2015.147), 2015-12-15
Supplement: cr2015147x32.pdf [file cr2015147x32.pdf]

**Supplementary Information, Table S2 Significant F3 tests among the samples**

| <b>Population Combination</b> | <b>F3 score</b> | <b>SD</b>   | <b>Z-score</b> |
|-------------------------------|-----------------|-------------|----------------|
| <u>NI:AFG,GRD</u>             | -0.0007043      | 0.000185367 | -3.79949       |
| <u>NI:AFG,TIM</u>             | -0.000306953    | 0.000146558 | -2.09441       |
| <u>NI:AFG,SI</u>              | -0.00293214     | 9.34E-05    | -31.377        |
| <u>NI:BEM,TIM</u>             | -0.00168889     | 0.000171135 | -9.86875       |
| <u>NI:BEM,SI</u>              | -0.00397415     | 0.000100887 | -39.3922       |
| <u>NI:BEM,W</u>               | -0.00120139     | 0.000125433 | -9.57799       |
| <u>NI:CHI,TIM</u>             | -0.00110014     | 0.000173329 | -6.34711       |
| <u>NI:CHI,SI</u>              | -0.00350073     | 0.000105043 | -33.3265       |
| <u>NI:CHI,W</u>               | -0.000871625    | 0.000111865 | -7.79179       |
| <u>NI:ESL,SI</u>              | -0.00189253     | 0.000115332 | -16.4094       |
| <u>NI:FIL,TIM</u>             | -0.000739671    | 0.000162024 | -4.5652        |
| <u>NI:FIL,SI</u>              | -0.00300898     | 0.00011272  | -26.6943       |
| <u>NI:FIL,W</u>               | -0.000382612    | 0.000121979 | -3.13669       |
| <u>NI:GAL,TIM</u>             | -0.00105937     | 0.000213092 | -4.97141       |
| <u>NI:GAL,SI</u>              | -0.0037629      | 0.000102634 | -36.6632       |
| <u>NI:GAL,W</u>               | -0.00089309     | 0.000128603 | -6.94457       |
| <u>NI:GNE,TIM</u>             | -0.000884692    | 0.00016307  | -5.42523       |
| <u>NI:GNE,SI</u>              | -0.00335848     | 0.000106048 | -31.6693       |
| <u>NI:GNE,W</u>               | -0.00088542     | 0.000114111 | -7.75926       |
| <u>NI:GRD,AF</u>              | -0.00121186     | 0.000166022 | -7.29941       |
| <u>NI:GRD,GSD</u>             | -0.00158573     | 0.000248434 | -6.38292       |
| <u>NI:GRD,SLO</u>             | -0.000629213    | 0.000198092 | -3.17637       |
| <u>NI:GSD,SIH</u>             | -0.000640423    | 0.000286997 | -2.23147       |
| <u>NI:GSD,TIM</u>             | -0.00276582     | 0.000212449 | -13.0187       |
| <u>NI:GSD,SI</u>              | -0.00526935     | 0.000152587 | -34.5333       |
| <u>NI:GSD,W</u>               | -0.00264468     | 0.000161555 | -16.3702       |
| <u>NI:JAM,TIM</u>             | -0.000885681    | 0.000169468 | -5.22625       |
| <u>NI:JAM,SI</u>              | -0.00344241     | 0.000105627 | -32.5902       |
| <u>NI:JAM,W</u>               | -0.000896936    | 0.000126286 | -7.10243       |
| <u>NI:LAH,TIM</u>             | -0.00082648     | 0.000181334 | -4.55778       |
| <u>NI:LAH,SI</u>              | -0.00318673     | 0.000106603 | -29.8935       |
| <u>NI:LAH,W</u>               | -0.000623917    | 0.000130696 | -4.7738        |
| <u>NI:MEN,TIM</u>             | -0.00136384     | 0.000154759 | -8.81268       |
| <u>NI:MEN,SI</u>              | -0.0037842      | 0.000125924 | -30.0515       |
| <u>NI:MEN,W</u>               | -0.00102129     | 0.000130129 | -7.84826       |
| <u>NI:PEN,TIM</u>             | -0.00126903     | 0.000181945 | -6.97481       |
| <u>NI:PEN,SI</u>              | -0.00379258     | 0.000112181 | -33.8076       |
| <u>NI:PEN,W</u>               | -0.000984372    | 0.000129282 | -7.61416       |
| <u>NI:SAM,TIM</u>             | -0.000590555    | 0.000151347 | -3.902         |
| <u>NI:SAM,SI</u>              | -0.00204392     | 0.000118787 | -17.2065       |
| <u>NI:SLO,TIM</u>             | -0.000682232    | 0.00029223  | -2.33457       |
| <u>NI:SLO,SI</u>              | -0.00360223     | 9.50E-05    | -37.9173       |
| <u>NI:SWL,TIM</u>             | -0.000984593    | 0.000169612 | -5.80498       |
| <u>NI:SWL,SI</u>              | -0.00321204     | 9.65E-05    | -33.2958       |
| <u>NI:SWL,W</u>               | -0.000570246    | 0.000140781 | -4.0506        |
| <u>NI:TIM,AF</u>              | -0.000261495    | 0.000125598 | -2.082         |

---

|                 |             |          |          |
|-----------------|-------------|----------|----------|
| <u>NI;SI,AF</u> | -0.00289933 | 9.30E-05 | -31.1828 |
|-----------------|-------------|----------|----------|

---

NI: Northern Chinese Indigenous dogs, W: wolves, SI: Southern Indigenous dogs, AF: African dogs.
