# Supplementary material for: Out of southern East Asia: the natural history of domestic dogs across the world
Source: PubMed Central journal article supplement — Cell Res. 2015 Dec 15;26(1):21–33. doi: 10.1038/cr.2015.147 (PMC4816135; doi:10.1038/cr.2015.147), 2015-12-15
Supplement: cr2015147x33.pdf [file cr2015147x33.pdf]

**Supplementary Information, Table S3 Candidate admixed populations revealed by the F4 test.**

| Step | Top admixed population             | # of supporting combinations*<br>(Z score $\geq 3$ or $\leq -3$ ) |
|------|------------------------------------|-------------------------------------------------------------------|
| 1    | Northern Chinese indigenous dogs   | 579                                                               |
| 2    | African village dogs               | 427                                                               |
| 3    | AFG ( <u>Afghan</u> )              | 306                                                               |
| 4    | SLO ( <u>Sloughi</u> )             | 183                                                               |
| 5    | ALM ( <u>Alaskan Malamute</u> )    | 136                                                               |
| 6    | SAM ( <u>Samoyed</u> )             | 103                                                               |
| 7    | ESL ( <u>East Siberian Laika</u> ) | 68                                                                |
| 8    | SIH ( <u>Siberian Husky</u> )      | 31                                                                |
| 9    | GRD ( <u>Greenland dog</u> )       | 10                                                                |

\* after removing combinations involving populations from previous steps.
