# Supplementary material for: Out of southern East Asia: the natural history of domestic dogs across the world
Source: PubMed Central journal article supplement — Cell Res. 2015 Dec 15;26(1):21–33. doi: 10.1038/cr.2015.147 (PMC4816135; doi:10.1038/cr.2015.147), 2015-12-15
Supplement: cr2015147x34.pdf [file cr2015147x34.pdf]

### Supplementary Information, Table S4 Mutation rate along the dog lineage

| Sister species                    | Estimated branch length     | Divergence time <sup>1</sup> | Mutation rate                         |
|-----------------------------------|-----------------------------|------------------------------|---------------------------------------|
| Cat                               | 0.0996                      | 45 M                         | 2.21*10 <sup>-9</sup>                 |
| Horse                             | 0.1535                      | 74M                          | 2.07*10 <sup>-9</sup>                 |
| Cattle                            | 0.1513                      | 83M                          | 1.82*10 <sup>-9</sup>                 |
| Mutation rate from the literature |                             |                              |                                       |
| 1.853-2.010*10 <sup>-9</sup>      | Liu et al 2006 <sup>2</sup> | 2.2*10 <sup>-9</sup>         | Kumar & Subramanian 2002 <sup>3</sup> |

<sup>1</sup>Hedges SB. The origin and evolution of model organisms. *Nat Rev Genet* 2002; **3**:838-849.

<sup>2</sup>Liu GE, Matukumalli LK, Sonstegard TS, Shade LL, Van Tassell CP. Genomic divergences among cattle, dog and human estimated from large-scale alignments of genomic sequences. *BMC Genomics* 2006; **7**.

<sup>3</sup>Kumar S, Subramanian S. Mutation rates in mammalian genomes. *Proc Natl Acad Sci U S A* 2002; **99**:803-808.
