# Supplementary material for: Out of southern East Asia: the natural history of domestic dogs across the world
Source: PubMed Central journal article supplement — Cell Res. 2015 Dec 15;26(1):21–33. doi: 10.1038/cr.2015.147 (PMC4816135; doi:10.1038/cr.2015.147), 2015-12-15
Supplement: cr2015147x35.pdf [file cr2015147x35.pdf]

**Supplementary Information, Table S5 Divergence time estimates using Markov chain Monte Carlo (MCMC) methods**

| <b>I) (wolves, (southern Chinese indigenous dogs, other_dogs));<sup>a</sup></b> |                            |                                |                       |                                                                |
|---------------------------------------------------------------------------------|----------------------------|--------------------------------|-----------------------|----------------------------------------------------------------|
| <b>Parameter</b>                                                                | $N_e^{\text{extant wolf}}$ | $N_e^{\text{ancestral\_wolf}}$ | <b>Tau2</b>           | <b>Tau1</b>                                                    |
| Estimated value                                                                 | 0.00215 (4N $\mu$ )        | 0.00167 (4N $\mu$ )            | 0.000032 <sup>c</sup> | 0.000067 <sup>c</sup> (BPP)<br>0.000082 <sup>c</sup> (G-PhoCS) |
| In real units                                                                   | 81,440 (N <sub>e</sub> )   | 63,260 (N <sub>e</sub> )       | 14, 545 y             | 30,455 y(BPP)<br>37,273 y(G-PhoCS)                             |
| <b>II) (wolf, (left_clade,right_clade));<sup>b</sup></b>                        |                            |                                |                       |                                                                |
| <b>Parameter</b>                                                                | $N_e^{\text{extant wolf}}$ | $N_e^{\text{ancestral\_wolf}}$ | <b>Tau3</b>           | <b>Tau1</b>                                                    |
| Estimated value                                                                 | 0.0023<br>(4N $\mu$ )      | 0.00167 (4N $\mu$ )            | 0.000021 <sup>c</sup> | 0.000063 <sup>c</sup> (BPP)<br>0.000072 <sup>c</sup> (G-PhoCS) |
| In real units                                                                   | 87,120(N <sub>e</sub> )    | 63,260 (N <sub>e</sub> )       | 9,545y                | 28,636 y (BPP)<br>32,727 y (G-PhoCS)                           |

<sup>a</sup>Estimates are very similar for all parameters except Tau1 for BPP/G-PhoCS analysis.

<sup>b</sup>The left clade is (FIL,LAH) and the right clade is the group including the 9 breeds (see Figure 2A). <sup>c</sup>Presented in terms of expected number of substitutions.
