# Supplementary material for: Out of southern East Asia: the natural history of domestic dogs across the world
Source: PubMed Central journal article supplement — Cell Res. 2015 Dec 15;26(1):21–33. doi: 10.1038/cr.2015.147 (PMC4816135; doi:10.1038/cr.2015.147), 2015-12-15
Supplement: cr2015147x36.pdf [file cr2015147x36.pdf]

**Supplementary Information, Table S6 Simulated histories testing BPP/G-PhoCS**

| Case ID                                                                                                                                                                                                                                                                                                                                                                                                                                                                                                                                                                                                                                                                                                                                                                                                                                                                                                                                                                                                                                                                                                                                                                                                                                                                                                                                                                                                         | Ancestral population | PopA              | PopB              | Migration rate (4Nm) |
|-----------------------------------------------------------------------------------------------------------------------------------------------------------------------------------------------------------------------------------------------------------------------------------------------------------------------------------------------------------------------------------------------------------------------------------------------------------------------------------------------------------------------------------------------------------------------------------------------------------------------------------------------------------------------------------------------------------------------------------------------------------------------------------------------------------------------------------------------------------------------------------------------------------------------------------------------------------------------------------------------------------------------------------------------------------------------------------------------------------------------------------------------------------------------------------------------------------------------------------------------------------------------------------------------------------------------------------------------------------------------------------------------------------------|----------------------|-------------------|-------------------|----------------------|
| 1_default                                                                                                                                                                                                                                                                                                                                                                                                                                                                                                                                                                                                                                                                                                                                                                                                                                                                                                                                                                                                                                                                                                                                                                                                                                                                                                                                                                                                       | $4N_e\mu=0.0017$     | $4N_e\mu=0.00201$ | $4N_e\mu=0.00105$ | 0                    |
| 2                                                                                                                                                                                                                                                                                                                                                                                                                                                                                                                                                                                                                                                                                                                                                                                                                                                                                                                                                                                                                                                                                                                                                                                                                                                                                                                                                                                                               | -                    | -                 | -                 | 0.1                  |
| 3                                                                                                                                                                                                                                                                                                                                                                                                                                                                                                                                                                                                                                                                                                                                                                                                                                                                                                                                                                                                                                                                                                                                                                                                                                                                                                                                                                                                               | -                    | -                 | -                 | 1.0                  |
| 4                                                                                                                                                                                                                                                                                                                                                                                                                                                                                                                                                                                                                                                                                                                                                                                                                                                                                                                                                                                                                                                                                                                                                                                                                                                                                                                                                                                                               | -                    | -                 | -                 | 10.0                 |
| 5                                                                                                                                                                                                                                                                                                                                                                                                                                                                                                                                                                                                                                                                                                                                                                                                                                                                                                                                                                                                                                                                                                                                                                                                                                                                                                                                                                                                               | bottleneck           | -                 | -                 | -                    |
| 6                                                                                                                                                                                                                                                                                                                                                                                                                                                                                                                                                                                                                                                                                                                                                                                                                                                                                                                                                                                                                                                                                                                                                                                                                                                                                                                                                                                                               | -                    | bottleneck        | -                 | -                    |
| 7                                                                                                                                                                                                                                                                                                                                                                                                                                                                                                                                                                                                                                                                                                                                                                                                                                                                                                                                                                                                                                                                                                                                                                                                                                                                                                                                                                                                               | -                    | -                 | bottleneck        | -                    |
| 8                                                                                                                                                                                                                                                                                                                                                                                                                                                                                                                                                                                                                                                                                                                                                                                                                                                                                                                                                                                                                                                                                                                                                                                                                                                                                                                                                                                                               | B+G                  | -                 | -                 | -                    |
| 9                                                                                                                                                                                                                                                                                                                                                                                                                                                                                                                                                                                                                                                                                                                                                                                                                                                                                                                                                                                                                                                                                                                                                                                                                                                                                                                                                                                                               | -                    | B+G               | -                 | -                    |
| 10                                                                                                                                                                                                                                                                                                                                                                                                                                                                                                                                                                                                                                                                                                                                                                                                                                                                                                                                                                                                                                                                                                                                                                                                                                                                                                                                                                                                              | -                    | -                 | B+G               | -                    |
| The ms code for the 10 cases                                                                                                                                                                                                                                                                                                                                                                                                                                                                                                                                                                                                                                                                                                                                                                                                                                                                                                                                                                                                                                                                                                                                                                                                                                                                                                                                                                                    |                      |                   |                   |                      |
| <p>1) ms 8 1000 -T -t 1.05 -I 2 4 4 -n 1 1.0 -n 2 0.5714286 -ej 0.03457163 2 1 -en 0.03457163 1 0.8095238</p> <p>2) ms 8 1000 -T -t 1.05 -I 2 4 4 0.1 -n 1 1.0 -n 2 0.5714286 -ej 0.03457163 2 1 -en 0.03457163 1 0.8095238 -eM 0.03457163 0</p> <p>3) ms 8 1000 -T -t 1.05 -I 2 4 4 1.0 -n 1 1.0 -n 2 0.5714286 -ej 0.03457163 2 1 -en 0.03457163 1 0.8095238 -eM 0.03457163 0</p> <p>4) ms 8 1000 -T -t 1.05 -I 2 4 4 10 -n 1 1.0 -n 2 0.5714286 -ej 0.03457163 2 1 -en 0.03457163 1 0.8095238 -eM 0.03457163 0</p> <p>5) ms 8 1000 -T -t 1.05 -I 2 4 4 -n 1 1.0 -n 2 0.5714286 -en 0.0293335 1 0.5 -ej 0.03457163 2 1 -en 0.03457163 1 0.8095238</p> <p>6) ms 8 1000 -T -t 1.05 -I 2 4 4 -n 1 1.0 -n 2 0.5714286 -en 0.0293335 2 0.2857143 -ej 0.03457163 2 1 -en 0.03457163 1 0.8095238</p> <p>7) ms 8 1000 -T -t 1.05 -I 2 4 4 -n 1 1.0 -n 2 0.5714286 -ej 0.03457163 2 1 -en 0.03457163 1 0.8095238 -en 0.06390514 1 0.4047619 -en 0.06914326 1 0.8095238</p> <p>8) ms 8 1000 -T -t 1.05 -I 2 4 4 -n 1 1.0 -n 2 0.5714286 -g 1 20.0496 -ej 0.03457163 2 1 -en 0.03457163 1 0.8095238</p> <p>9) ms 8 1000 -T -t 1.05 -I 2 4 4 -n 1 1.0 -n 2 0.5714286 -g 2 20.0496 -ej 0.03457163 2 1 -en 0.03457163 1 0.8095238</p> <p>10) ms 8 1000 -T -t 1.05 -I 2 4 4 -n 1 1.0 -n 2 0.5714286 -ej 0.03457163 2 1 -en 0.03457163 1 0.8095238 -eg 0.03457163 1 20.0496 -eg 0.06914326 1 0 -en 0.06914326 1 0.8095238</p> |                      |                   |                   |                      |
