# Supplementary material for: Out of southern East Asia: the natural history of domestic dogs across the world
Source: PubMed Central journal article supplement — Cell Res. 2015 Dec 15;26(1):21–33. doi: 10.1038/cr.2015.147 (PMC4816135; doi:10.1038/cr.2015.147), 2015-12-15
Supplement: cr2015147x37.pdf [file cr2015147x37.pdf]

**Supplementary Information, Table S7 The inferred tree topologies under different migration rates**

| <b>migration</b> | <b>Tree 1*</b> | <b>Tree 2</b> | <b>Tree 3</b> | <b>Tree 4</b> | <b>Tree 5</b> |
|------------------|----------------|---------------|---------------|---------------|---------------|
| <b>0</b>         | 100            | 0             | 0             | 0             | 0             |
| <b>1</b>         | 100            | 0             | 0             | 0             | 0             |
| <b>5</b>         | 100            | 0             | 0             | 0             | 0             |
| <b>10</b>        | 100            | 0             | 0             | 0             | 0             |
| <b>50</b>        | 100            | 0             | 0             | 0             | 0             |
| <b>100</b>       | 0              | 0             | 99            | 1             | 0             |

Tree 1: (((pop3,pop2),pop4),pop1); the simulated true topology

Tree 2: (((pop3,pop4),pop2),pop1);

Tree 3: (((pop3,pop2),pop1),pop4);

Tree 4: ((pop3,(pop2,pop1)),pop4);

Tree 5: ((pop3,pop4),(pop2,pop1));
