# Supplementary material for: Out of southern East Asia: the natural history of domestic dogs across the world
Source: PubMed Central journal article supplement — Cell Res. 2015 Dec 15;26(1):21–33. doi: 10.1038/cr.2015.147 (PMC4816135; doi:10.1038/cr.2015.147), 2015-12-15
Supplement: cr2015147x38.pdf [file cr2015147x38.pdf]

**Supplementary Information, Table S8 D test results between wolves and dogs**

| D((Outgroup, ISW), (dogY, dogZ)), ISW is Israeli wolf         |                         |
|---------------------------------------------------------------|-------------------------|
| Dog Y population                                              | # combination with Z<-3 |
| AF                                                            | 17                      |
| SLO                                                           | 10                      |
| AFG                                                           | 8                       |
| BEM                                                           | 6                       |
| CHI                                                           | 6                       |
| GAL                                                           | 6                       |
| GNE                                                           | 6                       |
| GSD                                                           | 6                       |
| JAM                                                           | 6                       |
| MEN                                                           | 6                       |
| PEN                                                           | 6                       |
| SWL                                                           | 6                       |
| ESL                                                           | 5                       |
| FIL                                                           | 5                       |
| LAH                                                           | 5                       |
| N                                                             | 3                       |
| SAM                                                           | 3                       |
| TIM                                                           | 1                       |
| D((Outgroup, CRW), (dogY,dogZ)), CRW is Croatian wolf         |                         |
| BEM                                                           | 1                       |
| GAL                                                           | 1                       |
| JAM                                                           | 1                       |
| D((Outgroup, CHW), (dogY,dogZ)), CHW is Chinese wolf          |                         |
| SI                                                            | 18                      |
| SIH                                                           | 14                      |
| NI                                                            | 9                       |
| GRD                                                           | 8                       |
| TIM                                                           | 6                       |
| ALM                                                           | 5                       |
| BEM                                                           | 1                       |
| ESL                                                           | 1                       |
| SAM                                                           | 1                       |
| SWL                                                           | 1                       |
| D((Outgroup, W), (dogY,dogZ)), W is the wolves from our study |                         |
| SI                                                            | 17                      |
| SIH                                                           | 11                      |
| GRD                                                           | 7                       |
| N                                                             | 6                       |
| TIM                                                           | 1                       |

In the D test, with the form  $D(W,X;Y,Z)$ , and assuming no migration between outgroup (W) and ingroups (X,Y, Z), a negative D value will suggest migrations between X and Y. We thus fix the X (target wolf population) and Y (dog) and iterate through multiple populations of Z (other dog populations). The number of combinations where this D value is statistically significantly less than zero is reported in this table.
