# Supplementary material for: Out of southern East Asia: the natural history of domestic dogs across the world
Source: PubMed Central journal article supplement — Cell Res. 2015 Dec 15;26(1):21–33. doi: 10.1038/cr.2015.147 (PMC4816135; doi:10.1038/cr.2015.147), 2015-12-15
Supplement: cr2015147x39.pdf [file cr2015147x39.pdf]

**Supplementary Information, Table S9 GO categories for genes identified using SweepFinder (extra categories not presented in the main text).**

|    |                                                                                                                                                                                             | <b>General processes</b> |          |
|----|---------------------------------------------------------------------------------------------------------------------------------------------------------------------------------------------|--------------------------|----------|
| MF | aromatase activity                                                                                                                                                                          | 6                        | 2.41E-04 |
| MF | oxidoreductase activity, acting on paired donors, with incorporation or reduction of molecular oxygen, reduced flavin or flavoprotein as one donor, and incorporation of one atom of oxygen | 6                        | 3.90E-04 |
| MF | mRNA binding                                                                                                                                                                                | 9                        | 4.18E-04 |
| MF | glutathione transferase activity                                                                                                                                                            | 5                        | 0.001685 |
| MF | cysteine-type endopeptidase inhibitor activity                                                                                                                                              | 6                        | 0.002341 |
| MF | peptidase inhibitor activity                                                                                                                                                                | 11                       | 0.005357 |
| CC | Membrane fraction                                                                                                                                                                           | 37                       | 0.006249 |
| CC | cell fraction                                                                                                                                                                               | 46                       | 0.008333 |
| MF | heme binding                                                                                                                                                                                | 9                        | 0.009191 |
| MF | transferase activity, transferring alkyl or aryl (other than methyl) groups                                                                                                                 | 6                        | 0.009448 |
| MF | enzyme inhibitor activity                                                                                                                                                                   | 15                       | 0.009496 |
| BP | extracellular structure organization                                                                                                                                                        | 11                       | 0.010049 |
| CC | insoluble fraction                                                                                                                                                                          | 37                       | 0.010956 |
| MF | endopeptidase inhibitor activity                                                                                                                                                            | 10                       | 0.012164 |
| MF | tetrapyrrole binding                                                                                                                                                                        | 9                        | 0.014291 |
| MF | Framingham Heart Study 100K Project: genome-wide associations for blood pressure and arterial stiffness                                                                                     | 4                        | 0.015267 |
| MF | adenyl ribonucleotide binding                                                                                                                                                               | 56                       | 0.016595 |
| MF | phosphoinositide binding                                                                                                                                                                    | 8                        | 0.022863 |
| MF | ribonucleotide binding                                                                                                                                                                      | 65                       | 0.023476 |
| MF | purine ribonucleotide binding                                                                                                                                                               | 65                       | 0.023476 |
| MF | nucleotide binding                                                                                                                                                                          | 77                       | 0.027053 |
| MF | adenyl nucleotide binding                                                                                                                                                                   | 57                       | 0.029545 |
| MF | hydrolase activity, acting on acid anhydrides, catalyzing transmembrane movement of substances                                                                                              | 8                        | 0.036772 |
| MF | purine nucleoside binding                                                                                                                                                                   | 57                       | 0.037498 |
| BP | receptor internalization                                                                                                                                                                    | 3                        | 0.03783  |
| CC | microsome                                                                                                                                                                                   | 13                       | 0.03809  |
| MF | purine nucleotide binding                                                                                                                                                                   | 66                       | 0.038889 |
| BP | positive regulation of cell-substrate adhesion                                                                                                                                              | 4                        | 0.04086  |
| MF | nucleoside binding                                                                                                                                                                          | 57                       | 0.041348 |
| BP | RNA splicing                                                                                                                                                                                | 14                       | 0.042548 |
| CC | vesicular fraction                                                                                                                                                                          | 13                       | 0.045237 |
| MF | cytoskeletal protein binding                                                                                                                                                                | 22                       | 0.04622  |
| MF | Ras GTPase activator activity                                                                                                                                                               | 7                        | 0.046805 |
| MF | glutamate receptor activity                                                                                                                                                                 | 4                        | 0.04925  |
| BP | mRNA processing                                                                                                                                                                             | 15                       | 0.051933 |
| MF | extracellular ligand-gated ion channel activity                                                                                                                                             | 6                        | 0.053977 |
| BP | nucleotide-excision repair                                                                                                                                                                  | 5                        | 0.054135 |
| MF | alkane 1-monooxygenase activity                                                                                                                                                             | 2                        | 0.058551 |
| MF | pyridoxal phosphate binding                                                                                                                                                                 | 5                        | 0.060626 |
| MF | vitamin B6 binding                                                                                                                                                                          | 5                        | 0.060626 |
| MF | phospholipid binding                                                                                                                                                                        | 10                       | 0.061365 |
| BP | RNA splicing, via transesterification reactions with bulged adenosine as nucleophile                                                                                                        | 9                        | 0.062246 |
| BP | RNA splicing, via transesterification reactions                                                                                                                                             | 9                        | 0.062246 |
| BP | nuclear mRNA splicing, via spliceosome                                                                                                                                                      | 9                        | 0.062246 |
| BP | negative regulation of translation                                                                                                                                                          | 4                        | 0.062485 |
| MF | ligand-gated channel activity                                                                                                                                                               | 8                        | 0.064174 |
| MF | ligand-gated ion channel activity                                                                                                                                                           | 8                        | 0.064174 |
| MF | electron carrier activity                                                                                                                                                                   | 11                       | 0.065911 |
| CC | non-membrane-bounded organelle                                                                                                                                                              | 85                       | 0.065947 |
| CC | intracellular non-membrane-bounded organelle                                                                                                                                                | 85                       | 0.065947 |
| BP | extracellular matrix organization                                                                                                                                                           | 7                        | 0.066838 |

|                                            |                                                                                                 |    |          |
|--------------------------------------------|-------------------------------------------------------------------------------------------------|----|----------|
| CC                                         | nuclear body                                                                                    | 10 | 0.069384 |
| BP                                         | regulation of cell adhesion                                                                     | 8  | 0.069677 |
| MF                                         | ionotropic glutamate receptor activity                                                          | 3  | 0.071664 |
| BP                                         | positive regulation of cell adhesion                                                            | 5  | 0.071908 |
| CC                                         | Cajal body                                                                                      | 4  | 0.075773 |
| MF                                         | lipid binding                                                                                   | 19 | 0.076017 |
| MF                                         | extracellular-glutamate-gated ion channel activity                                              | 3  | 0.080341 |
| MF                                         | GTPase activator activity                                                                       | 11 | 0.081255 |
| CC                                         | extracellular matrix                                                                            | 16 | 0.083184 |
| BP                                         | negative regulation of activin receptor signaling pathway                                       | 2  | 0.083383 |
| BP                                         | Genome-wide association analysis of susceptibility and clinical phenotype in multiple sclerosis | 4  | 0.085307 |
| BP                                         | cell projection assembly                                                                        | 6  | 0.085543 |
| MF                                         | aryl hydrocarbon receptor binding                                                               | 2  | 0.086532 |
| CC                                         | proteinaceous extracellular matrix                                                              | 15 | 0.08953  |
| MF                                         | oxygen binding                                                                                  | 4  | 0.090488 |
| CC                                         | cytoskeleton                                                                                    | 47 | 0.094495 |
| MF                                         | SNARE binding                                                                                   | 4  | 0.096408 |
| <b>Metabolism and motility</b>             |                                                                                                 |    |          |
| BP                                         | purine ribonucleotide metabolic process                                                         | 9  | 0.027004 |
| BP                                         | purine ribonucleoside triphosphate metabolic process                                            | 8  | 0.032259 |
| BP                                         | ribonucleoside triphosphate metabolic process                                                   | 8  | 0.033707 |
| BP                                         | regulation of catabolic process                                                                 | 7  | 0.05025  |
| BP                                         | purine nucleotide metabolic process                                                             | 10 | 0.058845 |
| BP                                         | nucleobase, nucleoside and nucleotide biosynthetic process                                      | 10 | 0.069829 |
| BP                                         | response to drug                                                                                | 11 | 0.071894 |
| CC                                         | myosin filament                                                                                 | 3  | 0.077248 |
| BP                                         | purine ribonucleotide biosynthetic process                                                      | 7  | 0.080424 |
| BP                                         | ATP biosynthetic process                                                                        | 6  | 0.085543 |
| MF                                         | ATPase activity, coupled to transmembrane movement of substances                                | 7  | 0.086168 |
| BP                                         | tRNA metabolic process                                                                          | 7  | 0.086261 |
| CC                                         | muscle myosin complex                                                                           | 3  | 0.086529 |
| MF                                         | ATP-dependent protein binding                                                                   | 2  | 0.086532 |
| MF                                         | ATPase activity, coupled to movement of substances                                              | 7  | 0.08929  |
| BP                                         | purine nucleotide biosynthetic process                                                          | 8  | 0.092541 |
| BP                                         | lipid transport                                                                                 | 8  | 0.092541 |
| <b>Sexual reproduction</b>                 |                                                                                                 |    |          |
| KEGG                                       | hsa04114:Oocyte meiosis                                                                         | 7  | 0.059439 |
| BP                                         | spermatid differentiation                                                                       | 5  | 0.060924 |
| BP                                         | reproductive cellular process                                                                   | 9  | 0.064227 |
| <b>Neurological process and perception</b> |                                                                                                 |    |          |
| BP                                         | synaptic vesicle transport                                                                      | 4  | 0.062485 |
| BP                                         | neurotransmitter secretion                                                                      | 4  | 0.062485 |
| BP                                         | behavior                                                                                        | 19 | 0.065582 |
| BP                                         | transmission of nerve impulse                                                                   | 15 | 0.079678 |
| CC                                         | postsynaptic membrane                                                                           | 8  | 0.09391  |
