# Supplementary material for: Out of southern East Asia: the natural history of domestic dogs across the world
Source: PubMed Central journal article supplement — Cell Res. 2015 Dec 15;26(1):21–33. doi: 10.1038/cr.2015.147 (PMC4816135; doi:10.1038/cr.2015.147), 2015-12-15
Supplement: cr2015147x40.pdf [file cr2015147x40.pdf]

**Supplementary Information, Table S10 Gene Ontology analysis for genes identified by combining FST and population diversity ratio**

| General biological processes |                                                                                                                                                        |    |          |
|------------------------------|--------------------------------------------------------------------------------------------------------------------------------------------------------|----|----------|
| MF                           | pancreatic ribonuclease activity                                                                                                                       | 4  | 3.25E-04 |
| MF                           | cysteine-type endopeptidase inhibitor activity                                                                                                         | 6  | 5.58E-04 |
| MF                           | endoribonuclease activity, producing 3'-phosphomonoesters                                                                                              | 4  | 0.00106  |
| MF                           | aryl hydrocarbon receptor binding                                                                                                                      | 3  | 0.001368 |
| BP                           | regulation of transcription, DNA-dependent                                                                                                             | 48 | 0.002201 |
| MF                           | protein complex binding                                                                                                                                | 12 | 0.002223 |
| MF                           | endonuclease activity, active with either ribo- or deoxyribonucleic acids and producing 3'-phosphomonoesters                                           | 4  | 0.004497 |
| BP                           | transcription                                                                                                                                          | 53 | 0.007359 |
| MF                           | endonuclease activity                                                                                                                                  | 7  | 0.009451 |
| MF                           | nuclease activity                                                                                                                                      | 9  | 0.009978 |
| MF                           | DNA binding                                                                                                                                            | 59 | 0.010078 |
| MF                           | carboxy-lyase activity                                                                                                                                 | 4  | 0.016021 |
| CC                           | gap junction                                                                                                                                           | 4  | 0.016912 |
| BP                           | regulation of transcription                                                                                                                            | 61 | 0.018409 |
| BP                           | Conduct disorder and ADHD: Evaluation of conduct problems as a categorical and quantitative trait in the international multicentre ADHD genetics study | 4  | 0.02057  |
| CC                           | cell projection                                                                                                                                        | 23 | 0.024842 |
| MF                           | protein heterodimerization activity                                                                                                                    | 10 | 0.026157 |
| BP                           | positive regulation of cell differentiation                                                                                                            | 10 | 0.031682 |
| MF                           | endoribonuclease activity                                                                                                                              | 4  | 0.03353  |
| MF                           | phosphatidylinositol binding                                                                                                                           | 3  | 0.040376 |
| MF                           | zinc ion binding                                                                                                                                       | 55 | 0.042172 |
| MF                           | metal ion binding                                                                                                                                      | 93 | 0.043186 |
| CC                           | cell projection part                                                                                                                                   | 10 | 0.044726 |
| MF                           | transition metal ion binding                                                                                                                           | 65 | 0.044811 |
| BP                           | mRNA processing                                                                                                                                        | 12 | 0.045415 |
| BP                           | lymphocyte differentiation                                                                                                                             | 6  | 0.047965 |
| MF                           | transcription repressor activity                                                                                                                       | 12 | 0.05065  |
| BP                           | cell-cell recognition                                                                                                                                  | 3  | 0.05104  |
| CC                           | spliceosome                                                                                                                                            | 7  | 0.052379 |
| BP                           | response to abiotic stimulus                                                                                                                           | 13 | 0.052894 |
| MF                           | cation binding                                                                                                                                         | 93 | 0.053417 |
| CC                           | nucleoplasm                                                                                                                                            | 26 | 0.055429 |
| BP                           | regulation of insulin receptor signaling pathway                                                                                                       | 3  | 0.056296 |
| BP                           | regulation of cell-substrate adhesion                                                                                                                  | 4  | 0.056772 |
| MF                           | ion binding                                                                                                                                            | 94 | 0.058547 |
| CC                           | nucleoplasm part                                                                                                                                       | 18 | 0.060363 |
| MF                           | peptidase inhibitor activity                                                                                                                           | 7  | 0.062049 |
| MF                           | helicase activity                                                                                                                                      | 7  | 0.063914 |
| BP                           | enzyme linked receptor protein signaling pathway                                                                                                       | 12 | 0.070832 |
| CC                           | intermediate filament                                                                                                                                  | 6  | 0.07852  |
| BP                           | cell-cell adhesion mediated by integrin                                                                                                                | 2  | 0.079037 |
| BP                           | cell recognition                                                                                                                                       | 4  | 0.085295 |
| CC                           | intermediate filament cytoskeleton                                                                                                                     | 6  | 0.085942 |

|                                              |                                                                                              |    |          |
|----------------------------------------------|----------------------------------------------------------------------------------------------|----|----------|
| BP                                           | nuclear import                                                                               | 5  | 0.092163 |
| MF                                           | vitamin B6 binding                                                                           | 4  | 0.092669 |
| MF                                           | pyridoxal phosphate binding                                                                  | 4  | 0.092669 |
| MF                                           | ribonuclease activity                                                                        | 4  | 0.09697  |
| BP                                           | protein palmitoylation                                                                       | 2  | 0.097804 |
| BP                                           | negative regulation of transcription                                                         | 14 | 0.099958 |
| <b>Neurological process</b>                  |                                                                                              |    |          |
| BP                                           | central nervous system neuron development                                                    | 4  | 0.026816 |
| BP                                           | negative regulation of response to stimulus                                                  | 6  | 0.042865 |
| BP                                           | central nervous system neuron differentiation                                                | 4  | 0.044574 |
| BP                                           | learning or memory                                                                           | 6  | 0.069617 |
| BP                                           | adult behavior                                                                               | 5  | 0.089123 |
| <b>Metabolism and digestion</b>              |                                                                                              |    |          |
| BP                                           | regulation of digestive system process                                                       | 4  | 0.001221 |
| BP                                           | regulation of RNA metabolic process                                                          | 49 | 0.00211  |
| BP                                           | regulation of intestinal cholesterol absorption                                              | 3  | 0.005873 |
| KEGG                                         | hsa00290:Valine, leucine and isoleucine biosynthesis                                         | 3  | 0.013699 |
| BP                                           | regulation of lipid transport                                                                | 4  | 0.017029 |
| BP                                           | regulation of glucose import                                                                 | 4  | 0.020652 |
| BP                                           | response to corticosteroid stimulus                                                          | 6  | 0.022409 |
| BP                                           | regulation of glucose transport                                                              | 4  | 0.022609 |
| BP                                           | regulation of cellular catabolic process                                                     | 5  | 0.031949 |
| KEGG                                         | hsa00500:Starch and sucrose metabolism                                                       | 4  | 0.031989 |
| BP                                           | negative regulation of insulin receptor signaling pathway                                    | 3  | 0.036447 |
| BP                                           | negative regulation of intestinal phytosterol absorption                                     | 2  | 0.040328 |
| BP                                           | negative regulation of intestinal cholesterol absorption                                     | 2  | 0.040328 |
| BP                                           | negative regulation of digestive system process                                              | 2  | 0.040328 |
| BP                                           | regulation of catabolic process                                                              | 6  | 0.041241 |
| MF                                           | Sitosterolemia                                                                               | 2  | 0.045369 |
| BP                                           | regulation of sterol transport                                                               | 3  | 0.05104  |
| BP                                           | regulation of cholesterol transport                                                          | 3  | 0.05104  |
| BP                                           | ribonucleotide metabolic process                                                             | 7  | 0.056186 |
| BP                                           | response to glucocorticoid stimulus                                                          | 5  | 0.064049 |
| BP                                           | purine ribonucleoside triphosphate metabolic process                                         | 6  | 0.065336 |
| BP                                           | negative regulation of nucleobase, nucleoside, nucleotide and nucleic acid metabolic process | 16 | 0.065937 |
| BP                                           | ribonucleoside triphosphate metabolic process                                                | 6  | 0.067458 |
| BP                                           | negative regulation of nitrogen compound metabolic process                                   | 16 | 0.072583 |
| BP                                           | purine nucleoside triphosphate metabolic process                                             | 6  | 0.076322 |
| BP                                           | digestion                                                                                    | 5  | 0.077462 |
| BP                                           | nucleoside triphosphate metabolic process                                                    | 6  | 0.095837 |
| BP                                           | mRNA metabolic process                                                                       | 12 | 0.099594 |
| <b>Regulation of developmental processes</b> |                                                                                              |    |          |
| BP                                           | positive regulation of developmental process                                                 | 12 | 0.019092 |
| BP                                           | in utero embryonic development                                                               | 8  | 0.056229 |
| BP                                           | urogenital system development                                                                | 6  | 0.065336 |
| BP                                           | gastrulation with mouth forming second                                                       | 3  | 0.06734  |
| BP                                           | thymus development                                                                           | 3  | 0.06734  |
| BP                                           | determination of symmetry                                                                    | 4  | 0.056772 |

---

|    |                                      |   |          |
|----|--------------------------------------|---|----------|
| BP | determination of bilateral symmetry  | 4 | 0.056772 |
| BP | determination of left/right symmetry | 4 | 0.053588 |

---
